# Supplementary material for: Electrocatalytic reduction of CO2 on size-selected nanoclusters of first-row transition metal nanoclusters: a comprehensive mechanistic investigation
Source: Royal Society of Chemistry journal article supplement (doi:10.1039/d3cp00739a), 2023-01-01
Supplement: d3cp00739a1.pdf [file d3cp00739a1.pdf]

# **Electrocatalytic Reduction of CO<sub>2</sub> on Size-Selected Nanoclusters of First-Row Transition Metal Nanoclusters: A Comprehensive Mechanistic Investigation**

Rajesh Kumar Raju<sup>a,b\*</sup>, Paramaconi Rodriguez<sup>a,c</sup>, and Edward N. Brothers<sup>b</sup>

<sup>a</sup> School of Chemistry, University of Birmingham, Edgbaston, Birmingham B15 2TT, United Kingdom

<sup>b</sup> Science Program, Texas A&M University, Education City, Doha, Qatar

<sup>c</sup> CIC EnergiGune, Parque Tecnológico de Álava, Albert Einstein, 48, 01510 Vitoria-Gasteiz, Álava, Spain

\* rajesh444@gmail.com

## Energy Corrections:

### Gas-phase corrections:

The free energy of a gaseous molecule is calculated using the following expression:

$$U(T) = ZPE + \Delta U_{0 \rightarrow T}$$

$$H(T) = U(T) + PV = ZPE + \Delta U_{0 \rightarrow T} + PV$$

$$G(T) = H(T) - TS = ZPE + \Delta U_{0 \rightarrow T} + PV - TS$$

Zero-point energy (ZPE) and entropy corrections for various gaseous species computed at 298.15 K and 1 atm are given in Table S1. All the molecules were optimized using PBE functional.

Table S1: Zero-point energy (ZPE, eV) and entropy corrections (TS\*, eV) for various gaseous species computed at 298K.

| Molecule           | ZPE   | TS    | H(T)  | G(T)   |
|--------------------|-------|-------|-------|--------|
| H <sub>2</sub> O   | 0.568 | 0.584 | 0.671 | 0.087  |
| CH <sub>3</sub> OH | 1.354 | 0.739 | 1.472 | 0.733  |
| HCOOH              | 0.887 | 0.769 | 1.000 | 0.231  |
| H <sub>2</sub>     | 0.269 | 0.403 | 0.359 | -0.044 |
| CO                 | 0.132 | 0.611 | 0.222 | -0.389 |
| CO <sub>2</sub>    | 0.307 | 0.662 | 0.405 | -0.258 |
| CH <sub>4</sub>    | 1.182 | 0.576 | 1.286 | 0.711  |

Gas-phase thermochemical reaction energies computed with PBE functional are inconsistent with experimental results. To accurately quantify these inconsistencies, we have compared the reaction enthalpies ( $\Delta H_{\text{PBE}}$ ) with the experimental reference reaction enthalpies ( $\Delta H_{\text{ref}}$ ) taken from the NIST database<sup>1</sup> for a dataset of nine reaction enthalpies that involve CO<sub>2</sub> and CO molecules. We have found an average error of +0.06 eV and -0.41 eV for reactions that involve CO<sub>2</sub> and CO respectively, and these corrections were added to the DFT energy values of CO<sub>2</sub> and CO. It can be seen that the errors of these nine reaction enthalpies reduced considerably after adding energy corrections to CO<sub>2</sub> and CO.

Table S2: Comparison of nine reaction enthalpies (eV) for reactions involving CO and CO<sub>2</sub>:  $\Delta H_{\text{ref}}$ , based on NIST database values;  $\Delta H_{\text{PBE}}$ , computed DFT values using PBE functional without any corrections;  $\Delta H_{\text{corr}}$ , DFT values corrected by adding energy corrections of +0.06 eV for CO<sub>2</sub> and -0.41 eV for CO.

| Reaction                                                                                  | $\Delta H_{\text{ref}}$ | $\Delta H_{\text{PBE}}$ | $\Delta H_{\text{PBE}} - \Delta H_{\text{ref}}$ | $\Delta H_{\text{corr}}$ | $\Delta H_{\text{corr}} - \Delta H_{\text{ref}}$ |
|-------------------------------------------------------------------------------------------|-------------------------|-------------------------|-------------------------------------------------|--------------------------|--------------------------------------------------|
| CO <sub>2</sub> + H <sub>2</sub> → CO + H <sub>2</sub> O                                  | 0.43                    | 0.86                    | 0.43                                            | 0.39                     | -0.04                                            |
| 4H <sub>2</sub> + CO <sub>2</sub> → CH <sub>4</sub> + H <sub>2</sub> O                    | -1.71                   | -1.66                   | 0.05                                            | -1.72                    | -0.01                                            |
| 3H <sub>2</sub> + CO → CH <sub>4</sub> + H <sub>2</sub> O                                 | -2.14                   | -2.52                   | -0.38                                           | -2.11                    | 0.03                                             |
| CO <sub>2</sub> + H <sub>2</sub> → HCOOH                                                  | 0.15                    | 0.07                    | -0.08                                           | 0.01                     | -0.14                                            |
| CO + H <sub>2</sub> O → HCOOH                                                             | -0.27                   | -0.79                   | -0.51                                           | -0.38                    | -0.10                                            |
| 3H <sub>2</sub> + CO <sub>2</sub> → CH <sub>3</sub> OH + H <sub>2</sub> O                 | -0.55                   | -0.52                   | 0.04                                            | -0.58                    | -0.02                                            |
| 2H <sub>2</sub> + CO → CH <sub>3</sub> OH                                                 | -0.98                   | -1.38                   | -0.40                                           | -0.97                    | 0.01                                             |
| 3H <sub>2</sub> + CO <sub>2</sub> → 1/2 C <sub>2</sub> H <sub>4</sub> + 2H <sub>2</sub> O | -0.66                   | -0.57                   | 0.09                                            | -0.63                    | 0.03                                             |
| 2H <sub>2</sub> + CO → 1/2 C <sub>2</sub> H <sub>4</sub> + H <sub>2</sub> O               | -1.09                   | 1.43                    | -0.35                                           | -1.03                    | 0.06                                             |

### Liquid-phase corrections:

CO<sub>2</sub> electron reduction reaction results in the release of H<sub>2</sub>O, HCOOH, and CH<sub>3</sub>OH which are formed in the liquid-phase. As it is difficult to calculate the liquid-phase free energies for H<sub>2</sub>O, HCOOH, and CH<sub>3</sub>OH with the DFT method, we applied an empirical correction based on the free energy difference between the formations of liquid and gas phases using the NIST database values. Based on this, liquid free energy corrections of -0.09 eV and -0.12 eV were applied to H<sub>2</sub>O and HCOOH respectively.

Table S3: Empirical liquid-phase free energy corrections (eV) from the free energy difference between the formations of liquid and gas phases using the NIST database values.

|                    | $\Delta_f G^\circ(l)/\text{kJ mol}^{-1}$ | $\Delta_f G^\circ(g)/\text{kJ mol}^{-2}$ | $\Delta_f G^\circ(l)$ eV | $\Delta_f G^\circ(g)$ eV | Difference |
|--------------------|------------------------------------------|------------------------------------------|--------------------------|--------------------------|------------|
| H <sub>2</sub> O   | -237.126                                 | -228.5457418                             | -2.4576                  | -2.3687                  | -0.0889    |
| CH <sub>3</sub> OH | -166.148                                 | -166.3493248                             | -1.7220                  | -1.7241                  | 0.0021     |
| HCOOH              | -362.589                                 | -350.9525505                             | -3.7579                  | -3.6373                  | -0.1206    |

### Solvent Corrections:

We have used an empirical solvent correction based on previously reported literature values. An empirical solvation correction of -0.5 eV was applied to OH\* species and for hydroxyl species that are indirectly bound to the nanocluster surface through other atoms such as COH\* and COOH\*, a solvent correction of -0.38 eV was applied. For other species that contain C-O bonds, a correction of -0.1 eV was applied.<sup>2,3</sup>

Table S4: Coefficient of determination (R<sup>2</sup>) for the linear free energy scaling relationship between the adsorption energies of CO<sub>2</sub>\*, O\* and C\* with other CO<sub>2</sub>RR adsorbates.

|                   |                     |      |   |                     |      |   |                     |      |
|-------------------|---------------------|------|---|---------------------|------|---|---------------------|------|
| CO <sub>2</sub> * | CHO*                | 0.93 | O | CH <sub>2</sub> O*  | 0.92 | C | CH*                 | 0.85 |
| CO <sub>2</sub> * | CH <sub>2</sub> O*  | 0.92 | O | OH*                 | 0.91 | C | CH <sub>2</sub> O*  | 0.82 |
| CO <sub>2</sub> * | OOCH*               | 0.91 | O | CHO*                | 0.90 | C | COH*                | 0.82 |
| CO <sub>2</sub> * | COOH*               | 0.91 | O | CH <sub>3</sub> O*  | 0.90 | C | CHOH*               | 0.82 |
| CO <sub>2</sub> * | O*                  | 0.89 | O | CO <sub>2</sub> *   | 0.89 | C | CO*                 | 0.80 |
| CO <sub>2</sub> * | CO*                 | 0.85 | O | CH <sub>2</sub> *   | 0.84 | C | CHO*                | 0.80 |
| CO <sub>2</sub> * | CH <sub>3</sub> O*  | 0.85 | O | OOCH*               | 0.84 | C | CO <sub>2</sub> *   | 0.80 |
| CO <sub>2</sub> * | OH*                 | 0.85 | O | COOH*               | 0.83 | C | CH <sub>2</sub> *   | 0.79 |
| CO <sub>2</sub> * | CH <sub>2</sub> *   | 0.82 | O | CHOH*               | 0.78 | C | COOH*               | 0.76 |
| CO <sub>2</sub> * | CHOH                | 0.82 | O | C*                  | 0.75 | C | O*                  | 0.75 |
| CO <sub>2</sub> * | C*                  | 0.80 | O | CH*                 | 0.75 | C | CH <sub>3</sub> O*  | 0.72 |
| CO <sub>2</sub> * | CH*                 | 0.71 | O | CO*                 | 0.68 | C | OOCH*               | 0.72 |
| CO <sub>2</sub> * | CH <sub>2</sub> OH* | 0.63 | O | COH*                | 0.66 | C | OH*                 | 0.71 |
| CO <sub>2</sub> * | COH*                | 0.62 | O | CH <sub>2</sub> OH* | 0.66 | C | CH <sub>2</sub> OH* | 0.62 |
| CO <sub>2</sub> * | CH <sub>3</sub> *   | 0.38 | O | CH <sub>3</sub> *   | 0.40 | C | H*                  | 0.45 |
| CO <sub>2</sub> * | H*                  | 0.35 | O | H*                  | 0.35 | C | CH <sub>3</sub> *   | 0.39 |

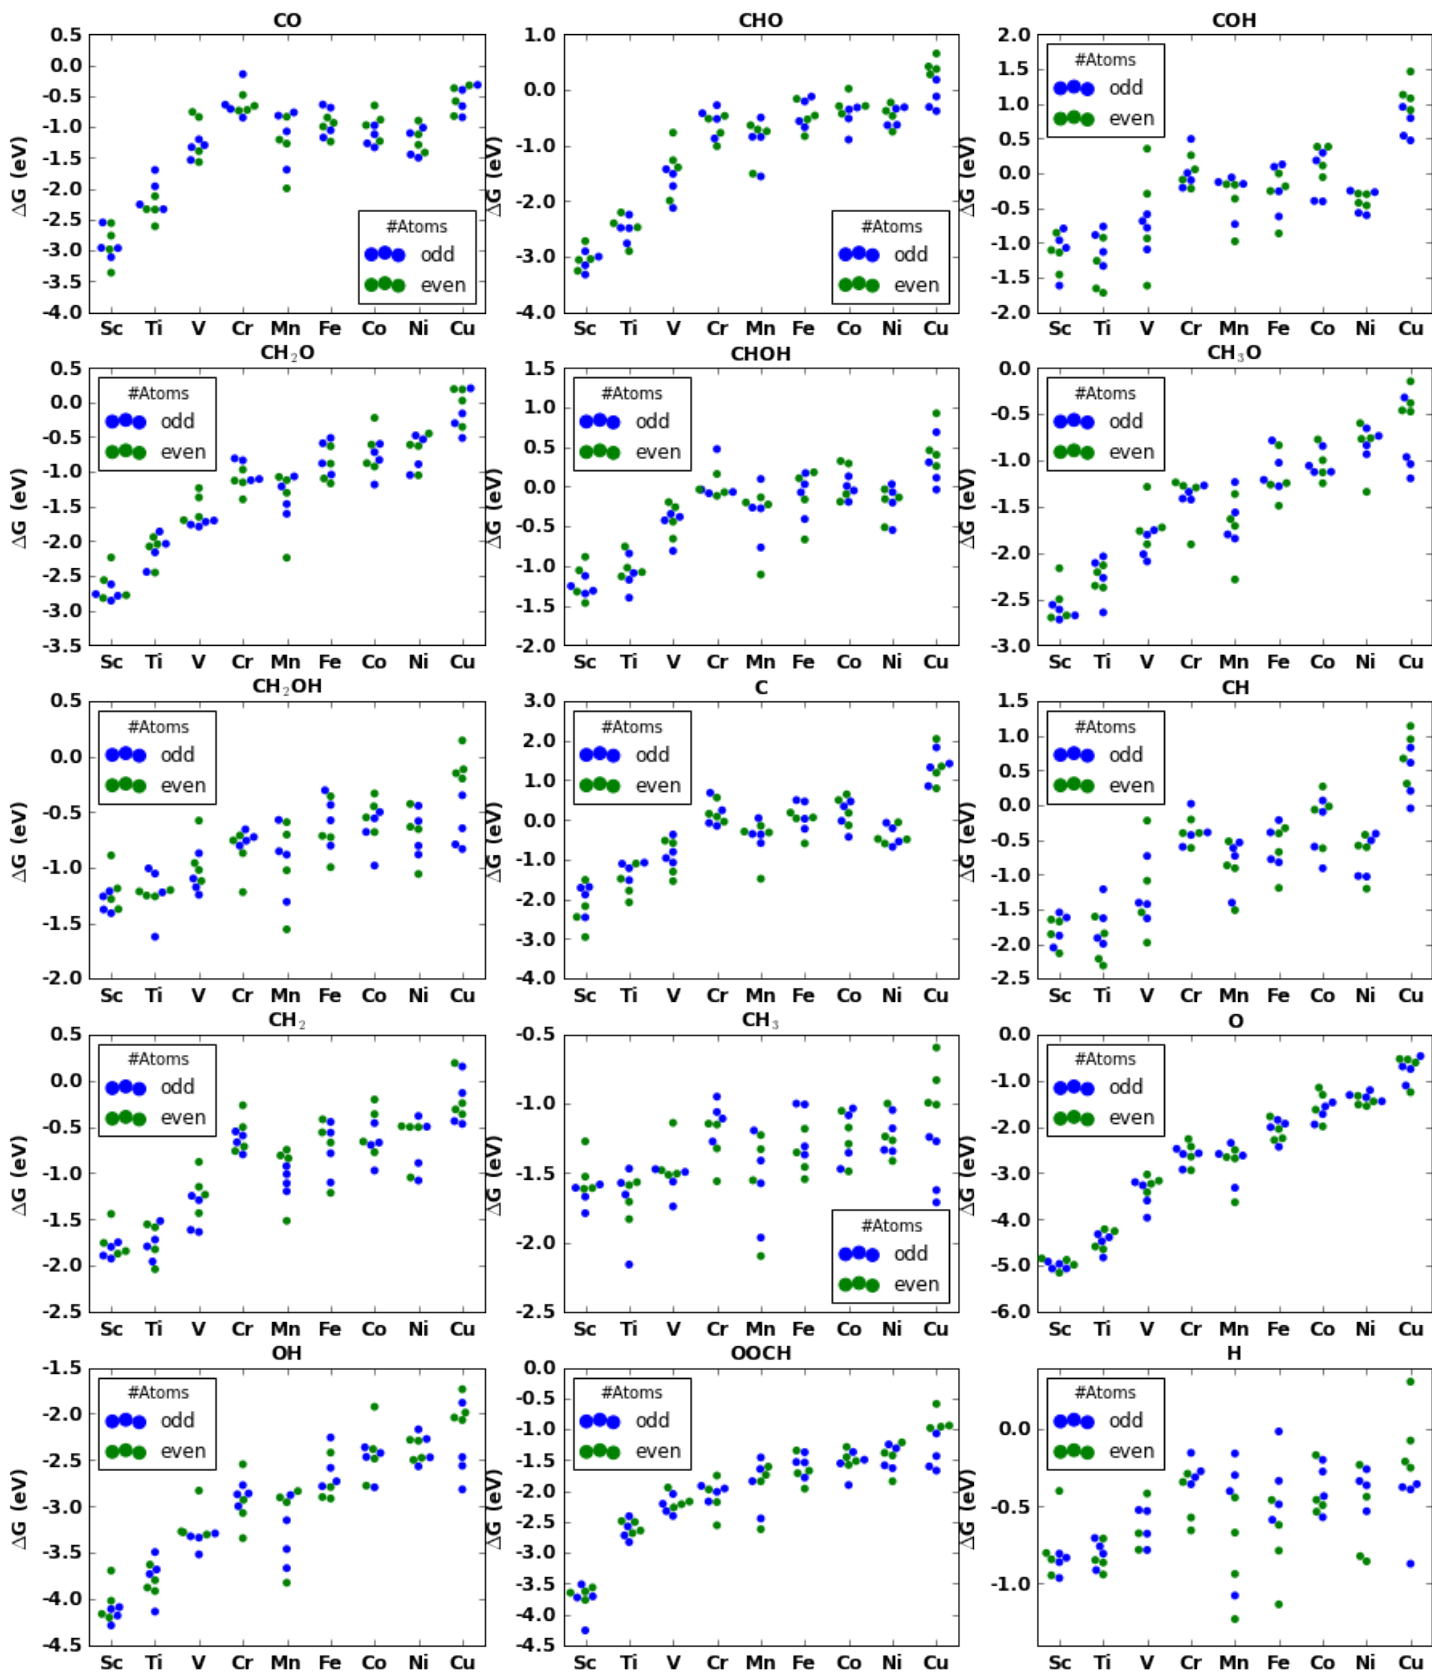

Figure S1: Adsorption free energies ( $\Delta G$ , eV) of various adsorbates on first-row transition metal nanoclusters.

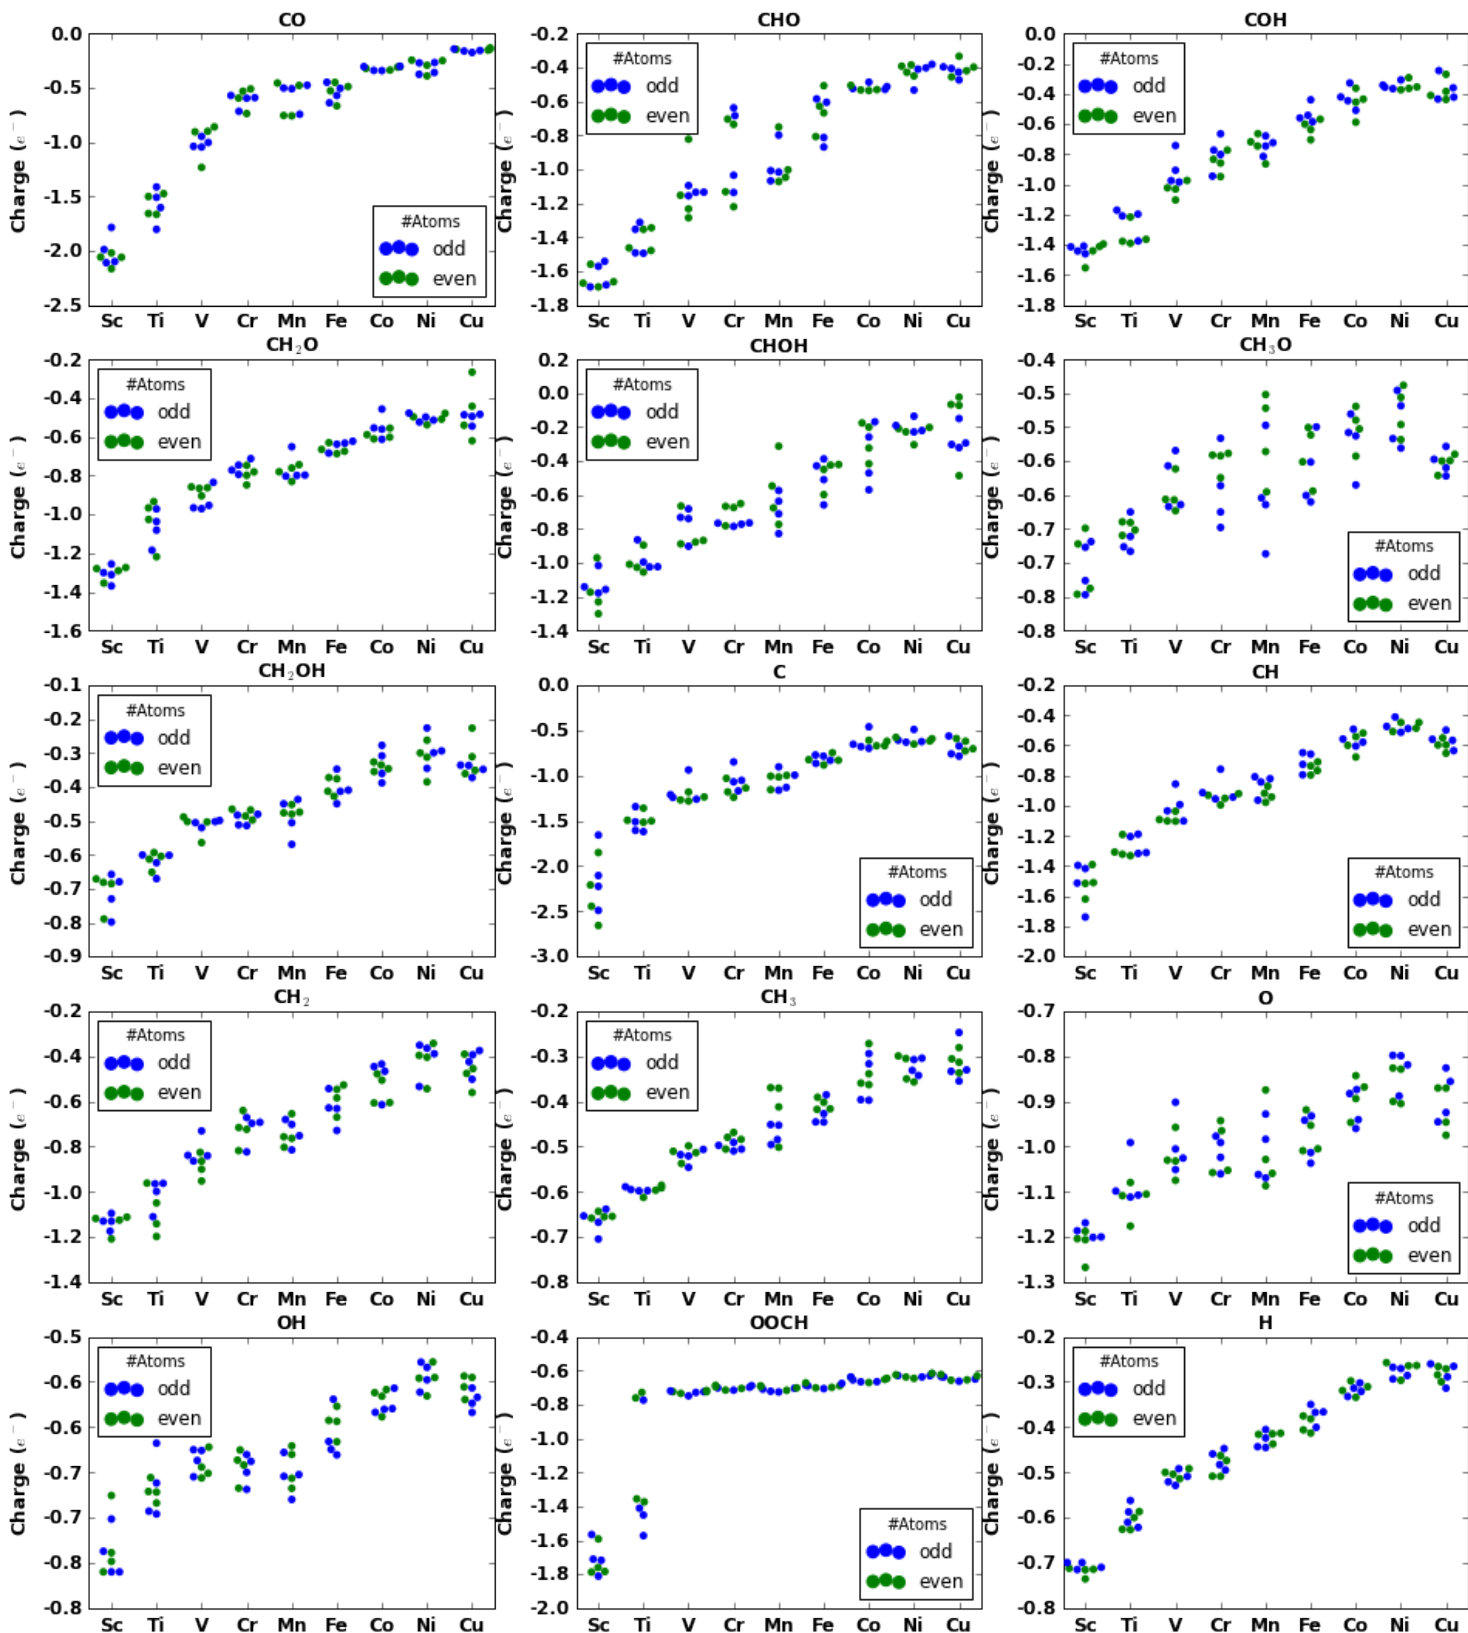

Figure S2: Residual changes ( $e^-$ ) on various adsorbed species on binding with first-row transition metal nanoclusters.

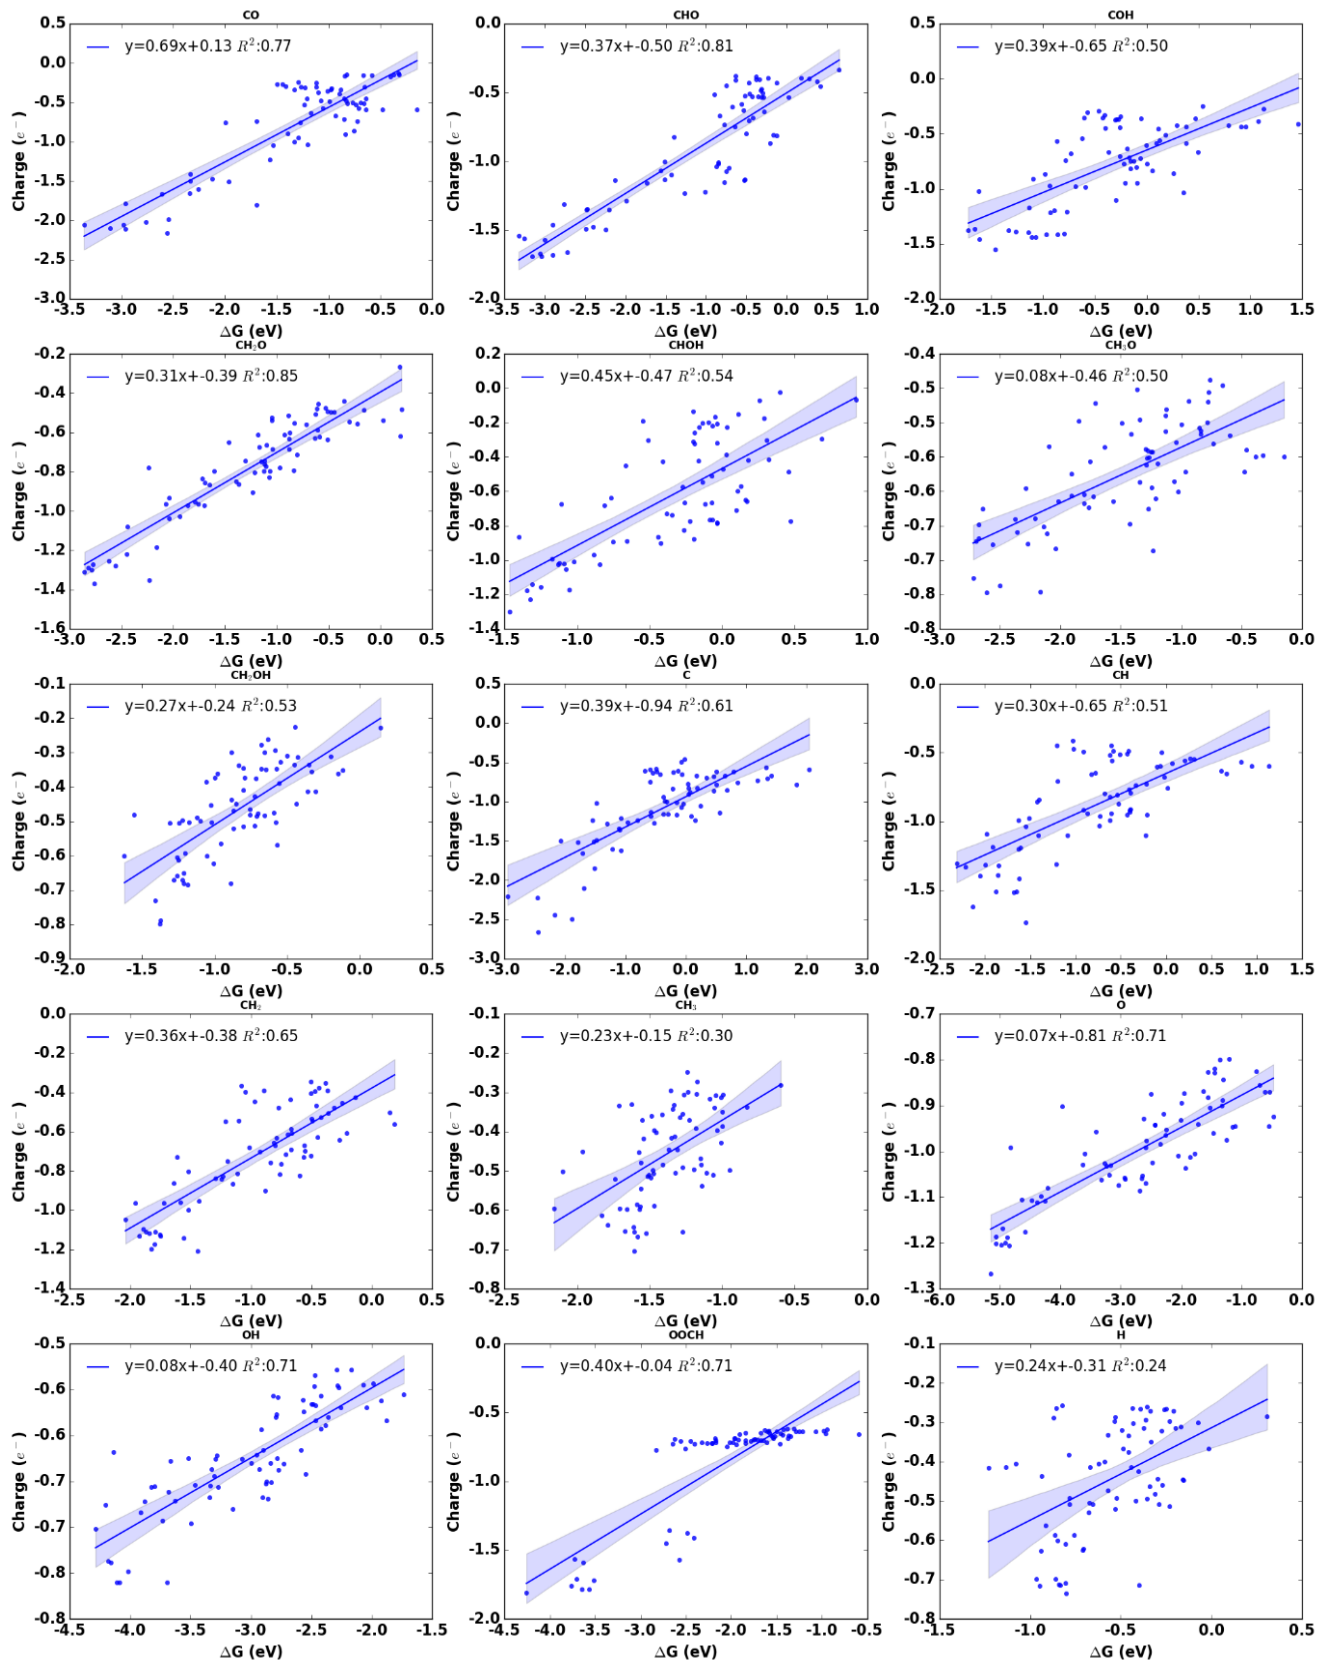

Figure S3: Correlation between residual charges (e<sup>-</sup>) on adsorbates and adsorption free energies (eV) for various adsorbates.

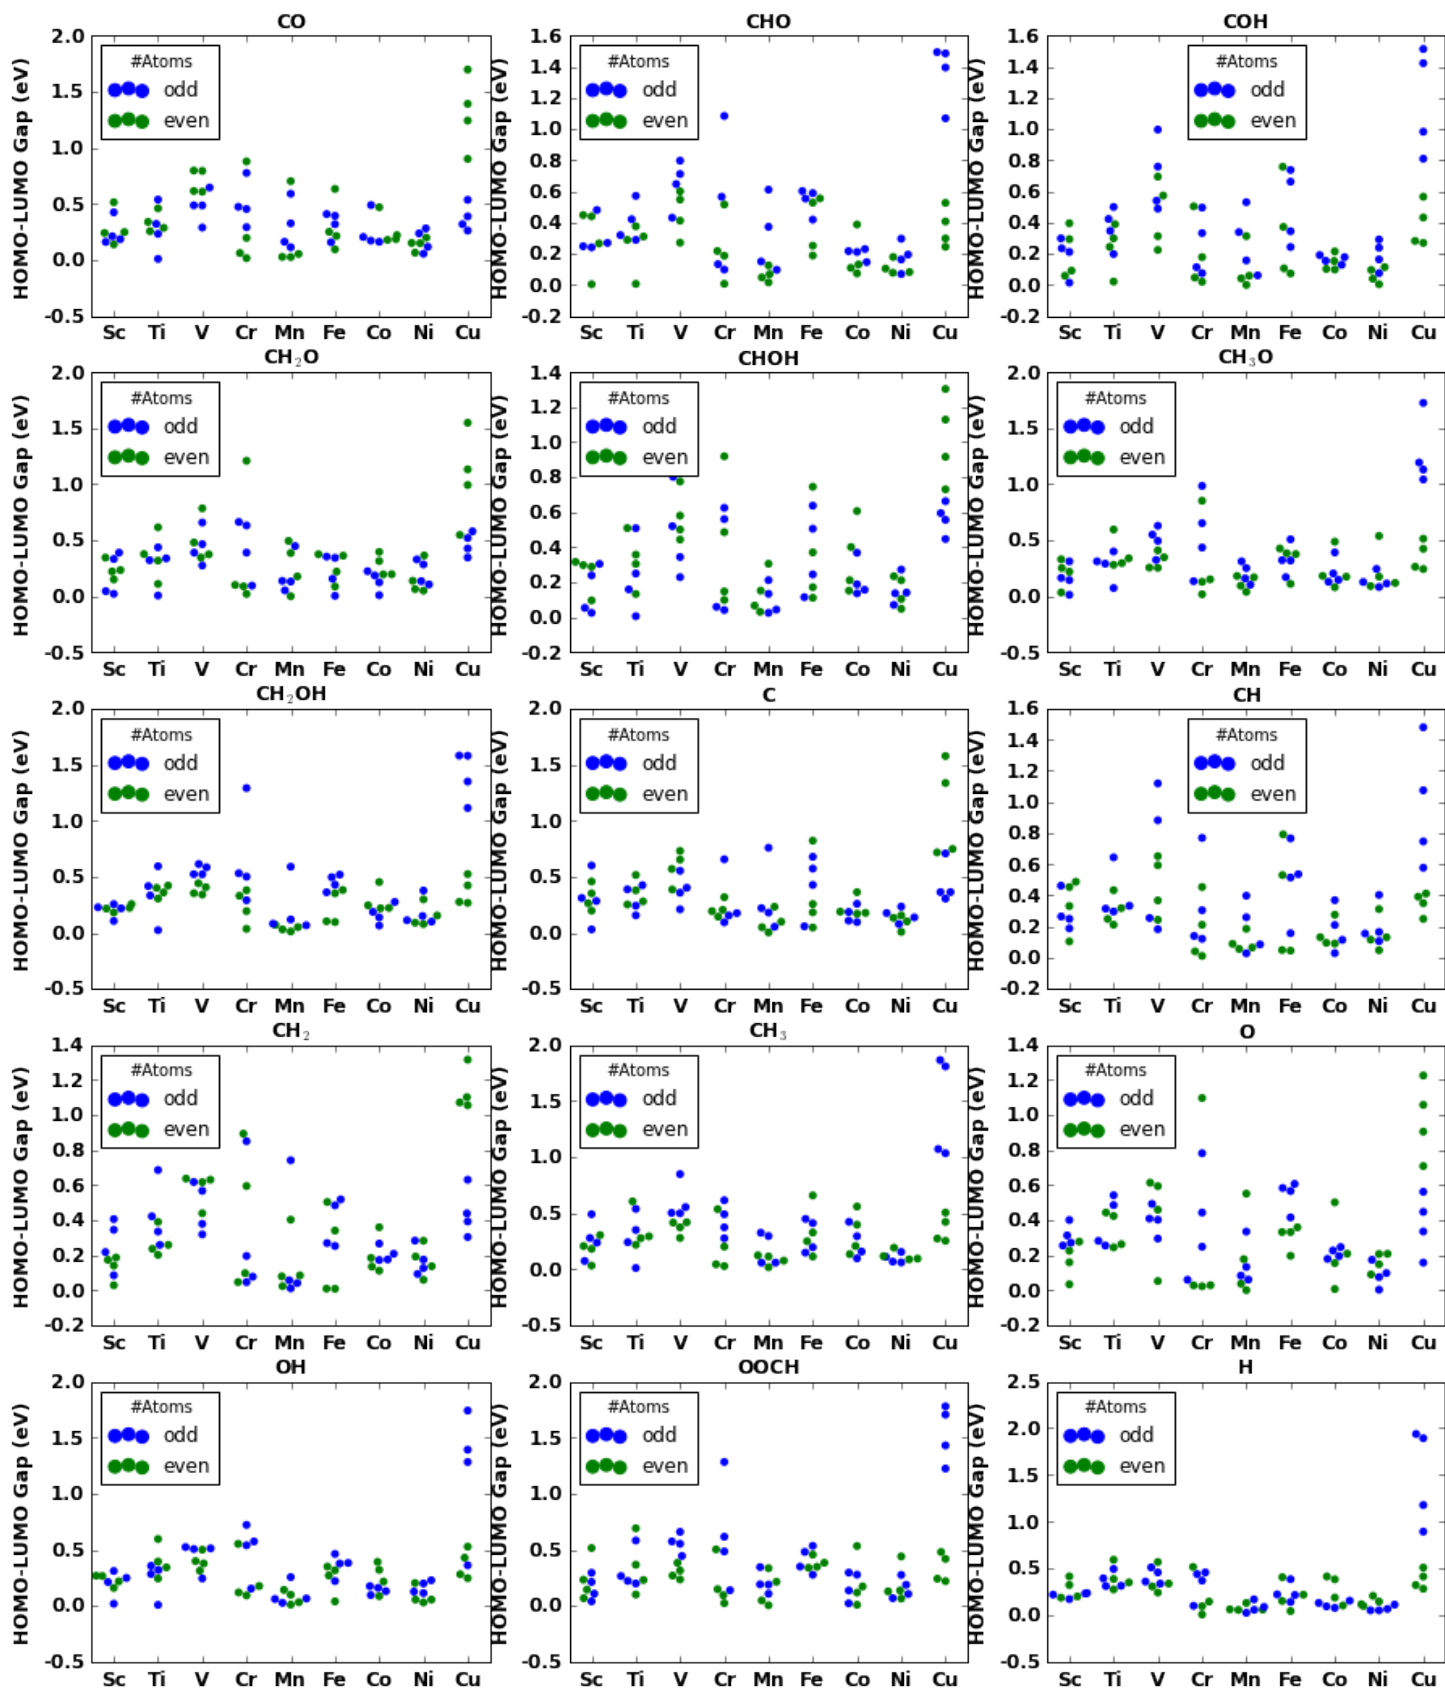

Figure S4: HOMO-LUMO gaps (eV) of various adsorbates bound on first-row transition metal nanoclusters.

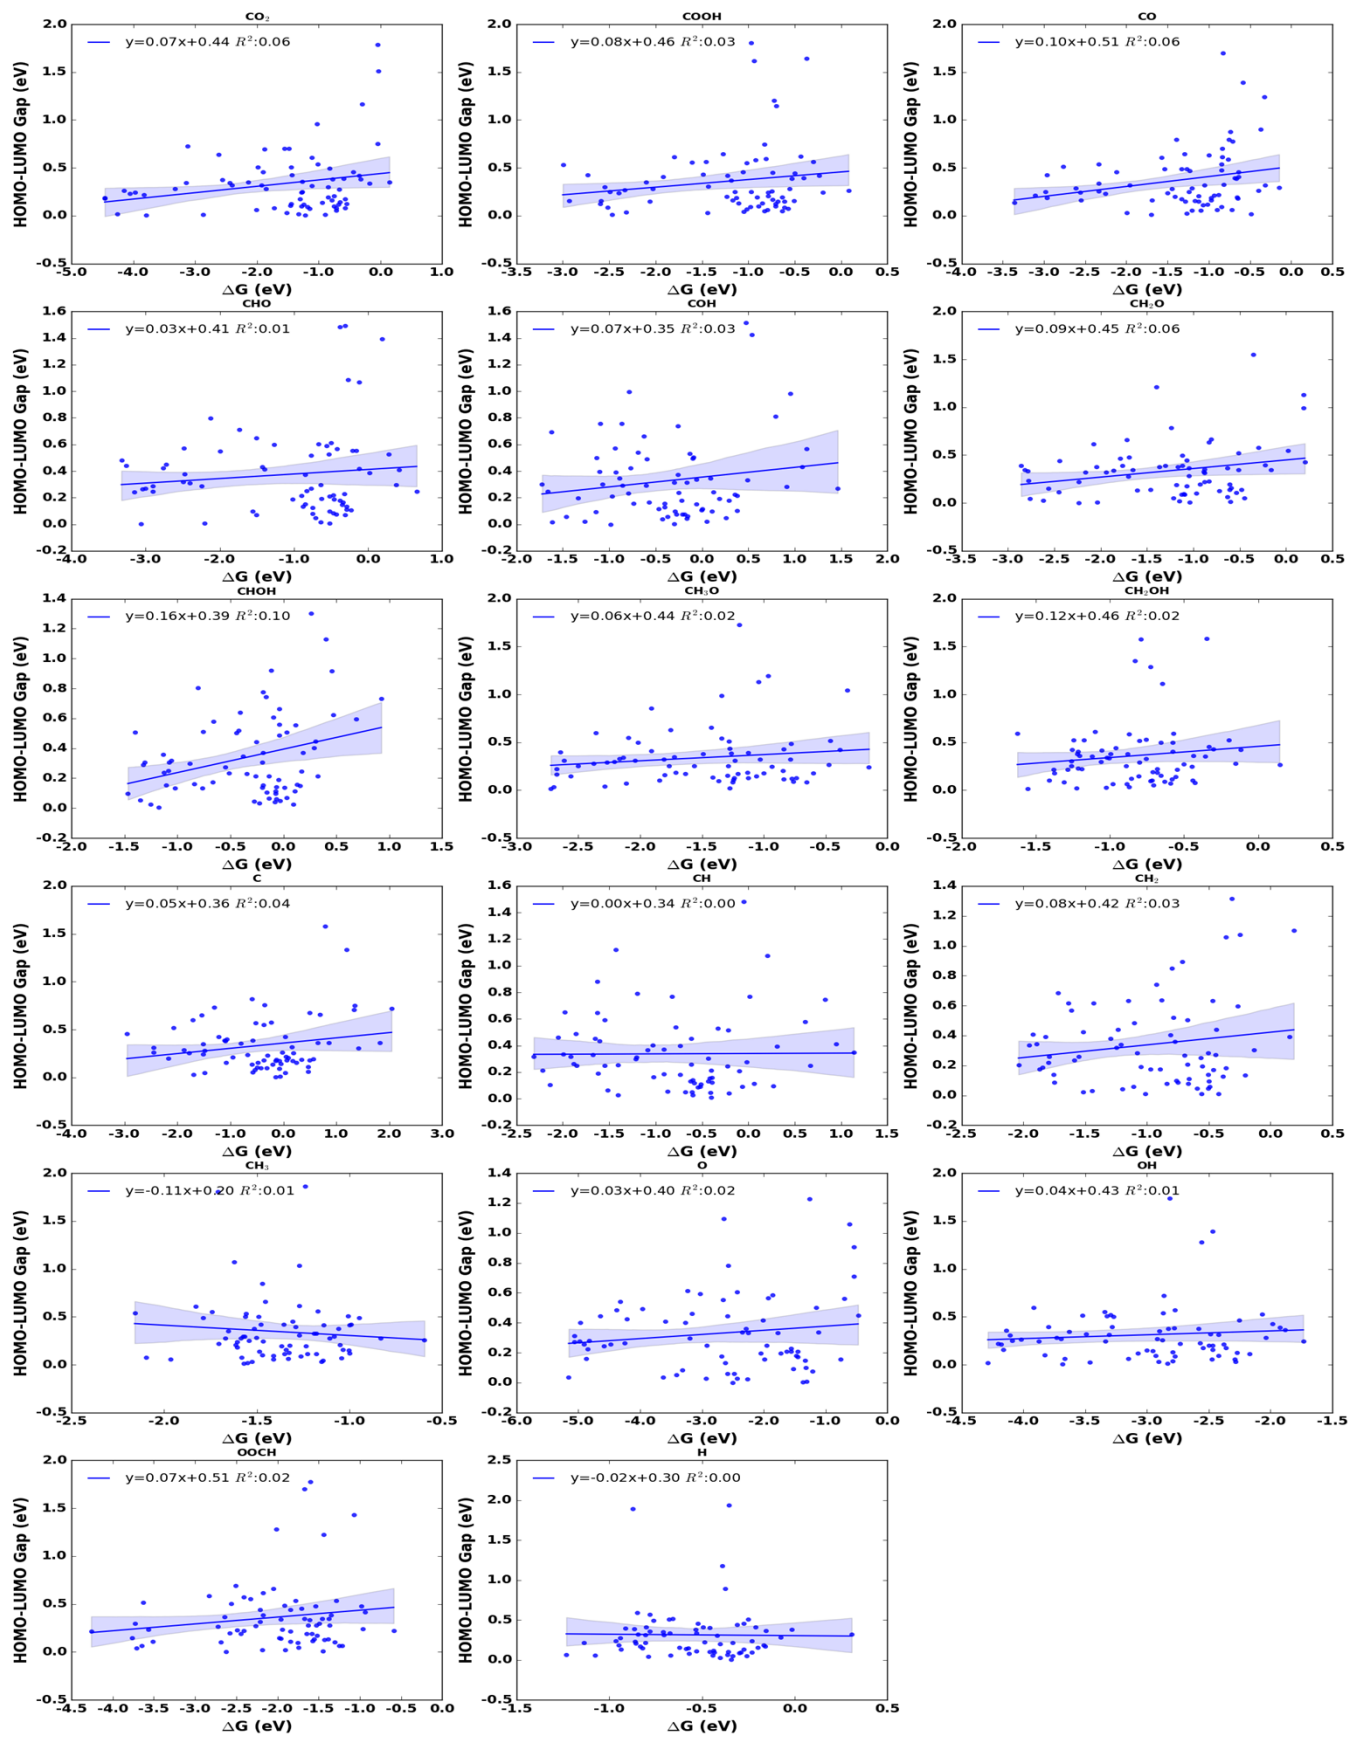

Figure S5: correlation between HOMO-LUMO gaps (eV) and adsorption free energies (eV) for various adsorbates.



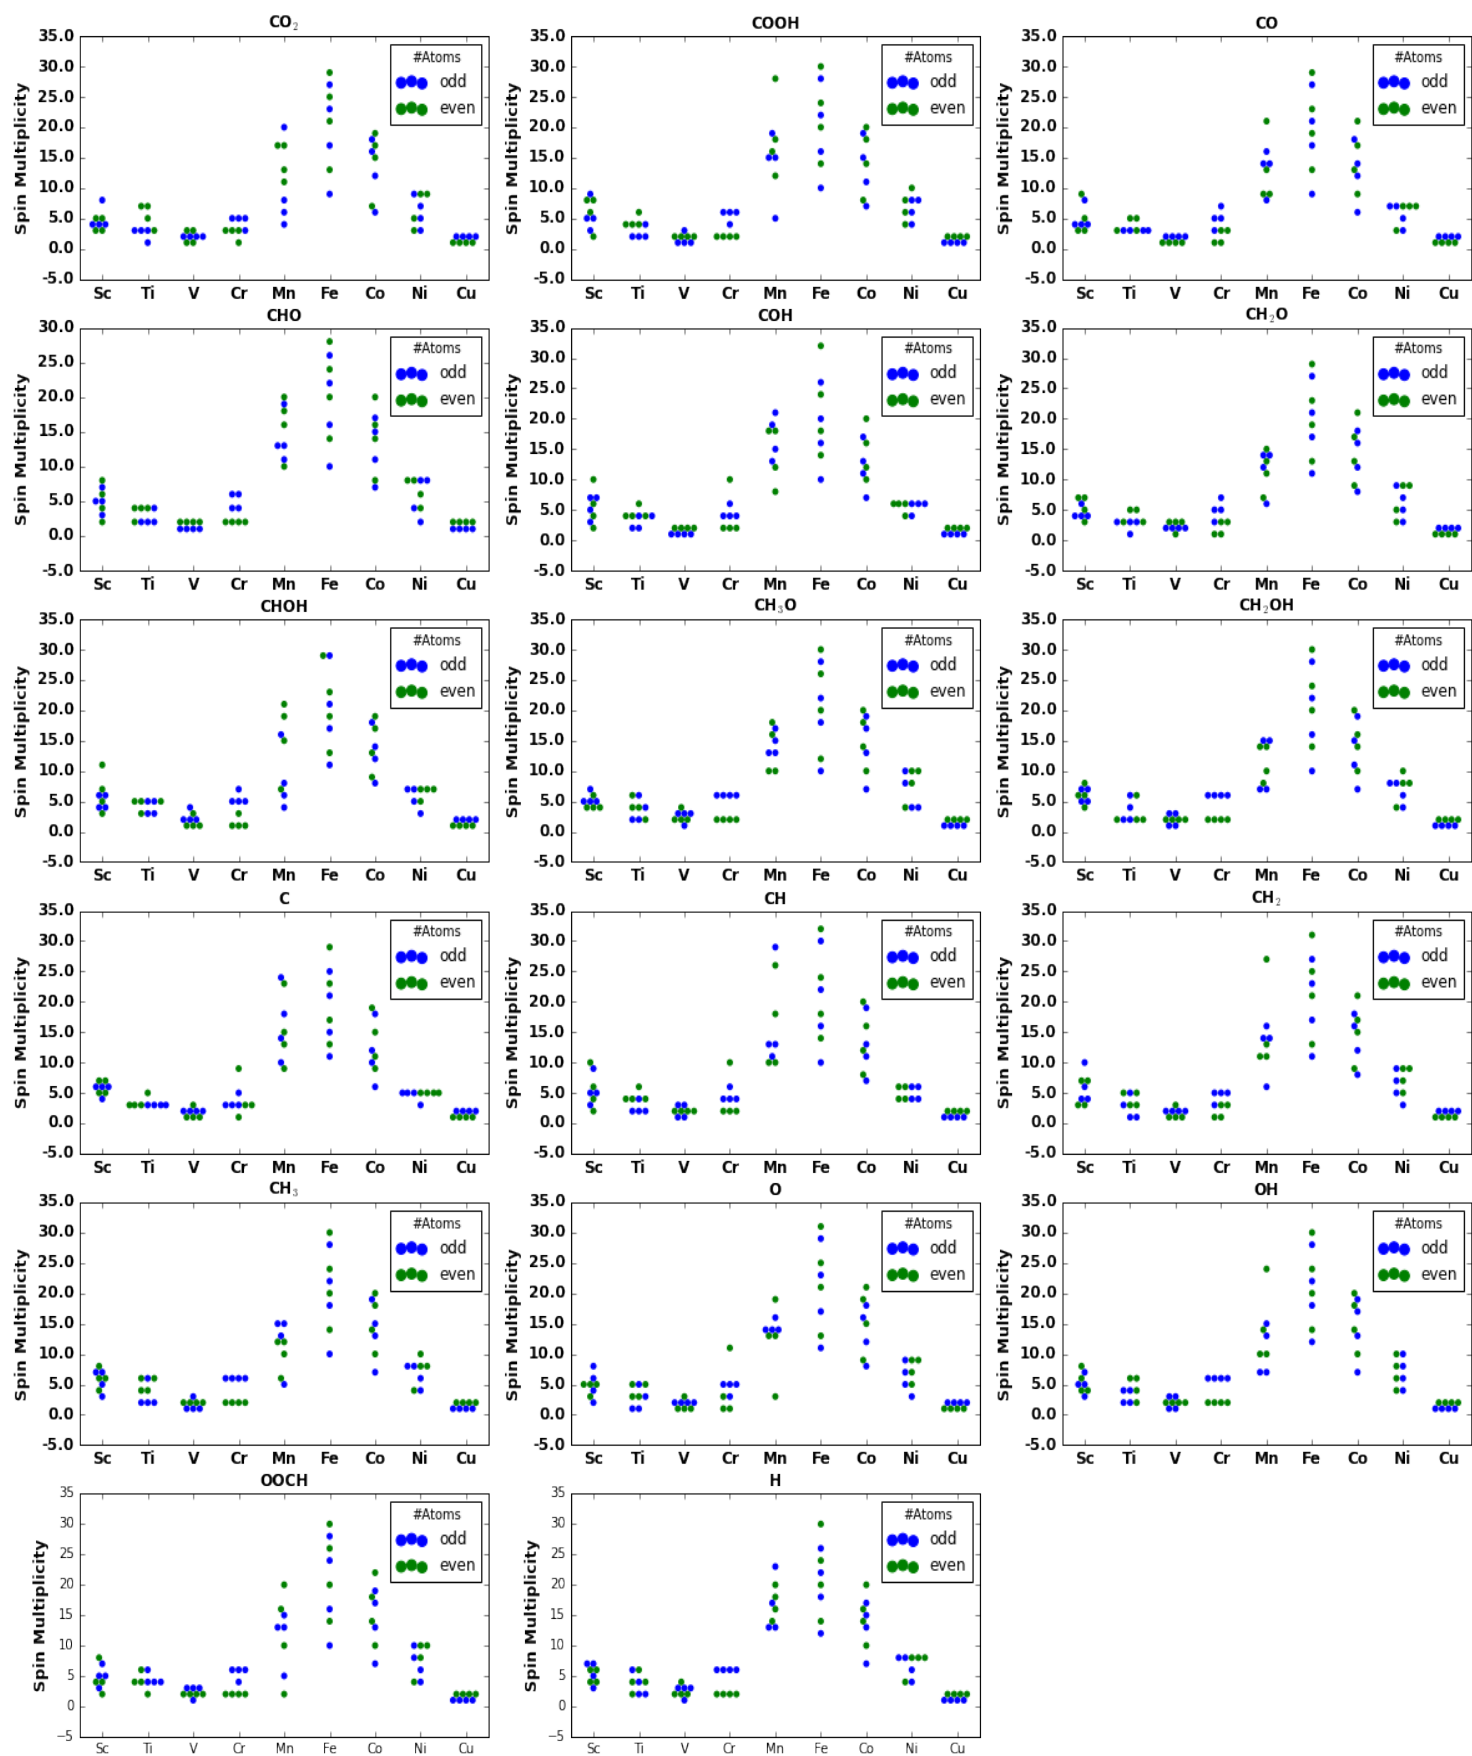

Figure S6: Spin multiplicities of various adsorbates bound on first-row transition metal nanoclusters.

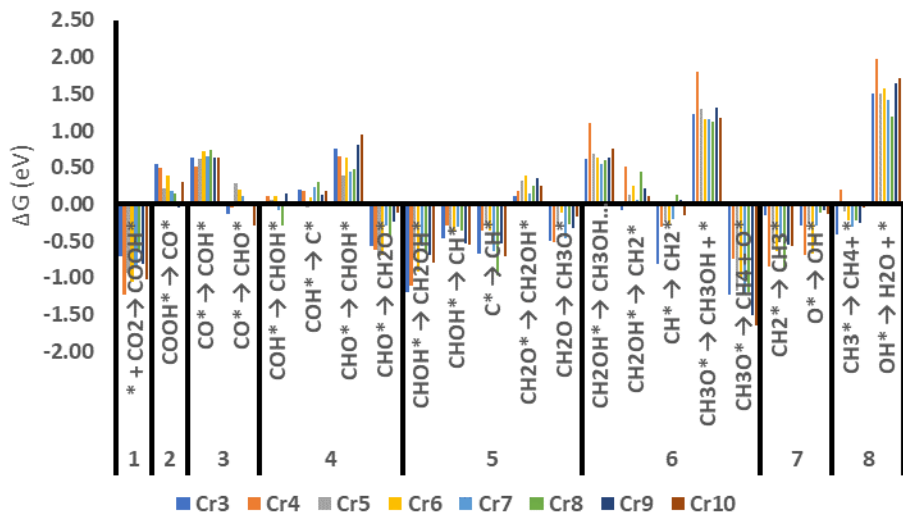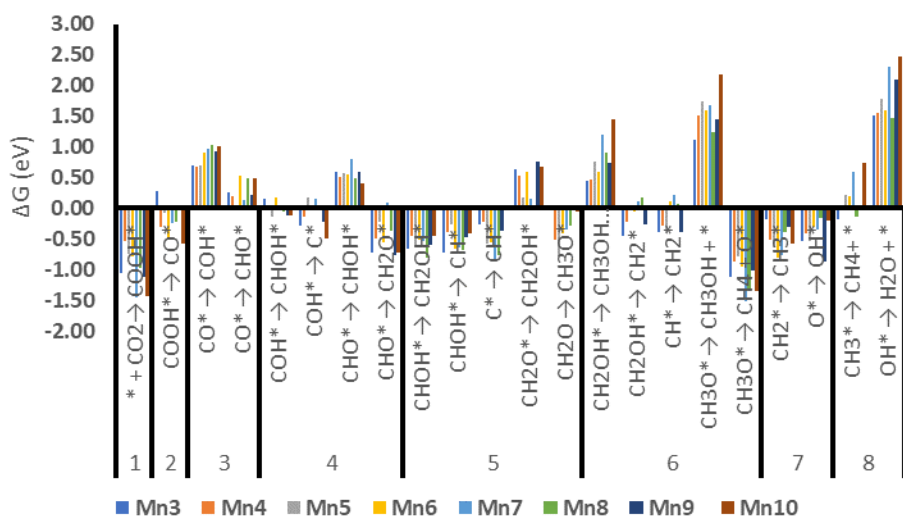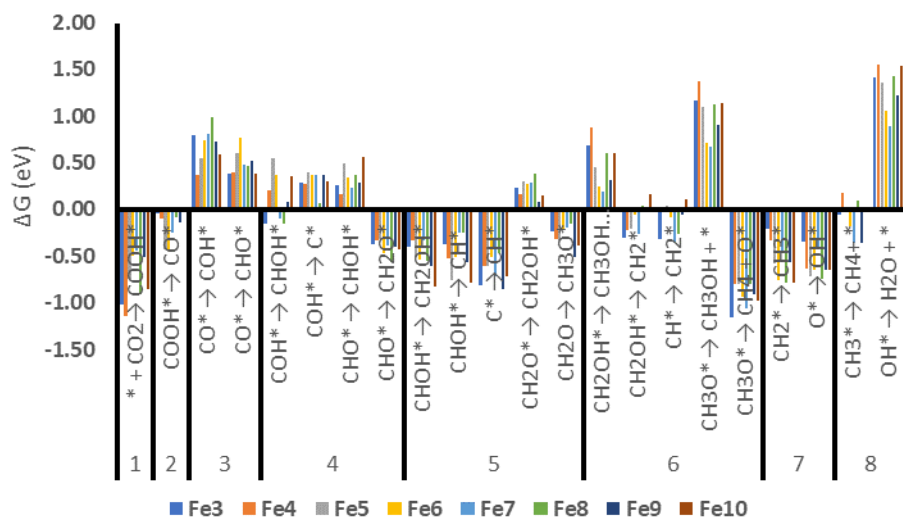

Figure S7: Free energy changes (eV) for various electrochemical steps in the CO<sub>2</sub>RR process on Cr, Mn and Fe clusters. Step numbers 1-8 show the total number of (H<sup>+</sup> + e<sup>-</sup>) pairs transferred.

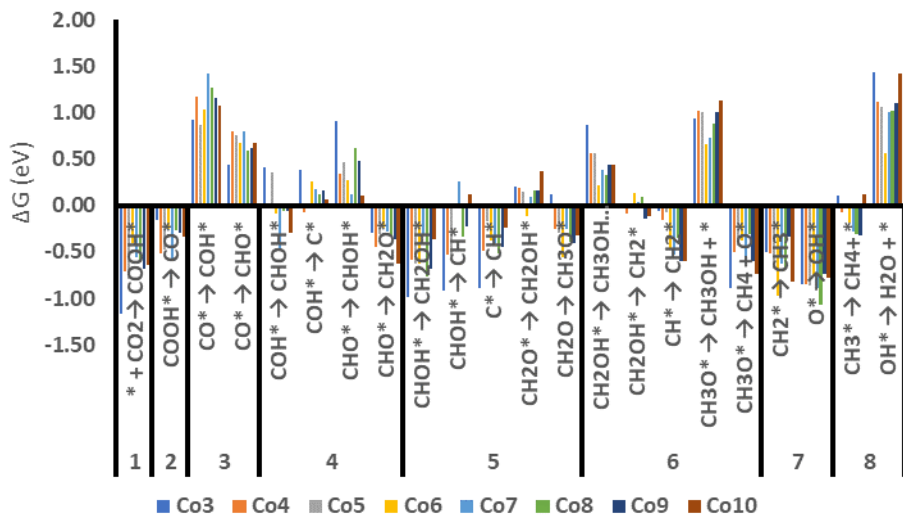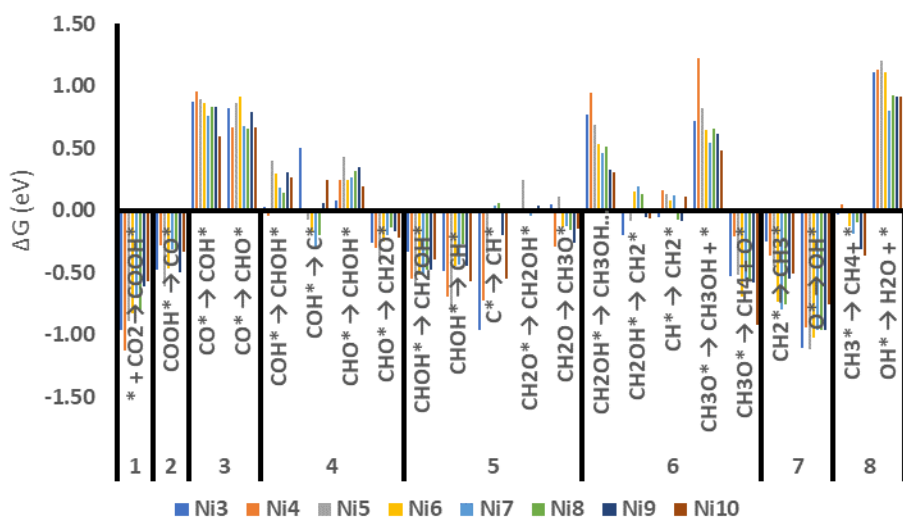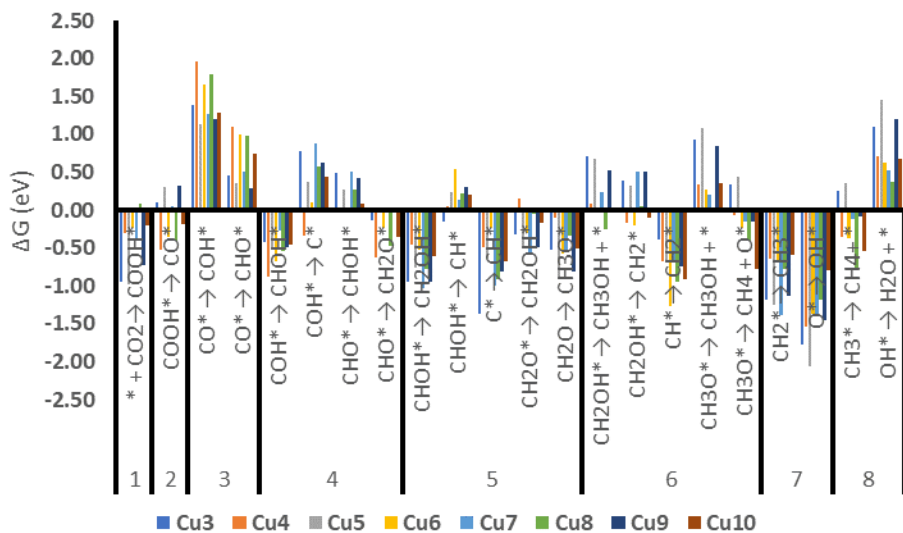

Figure S8: Free energy changes (eV) for various electrochemical steps in the  $\text{CO}_2\text{RR}$  process on Co, Ni and Cu clusters. Step numbers 1-8 show the total number of ( $\text{H}^+ + \text{e}^-$ ) pairs transferred.

Table S5: Adsorption free energies ( $\Delta G$ , eV) of CO<sub>2</sub>RR adsorbates on various first-row transition metal nanoclusters (Sc<sub>n</sub>-Cu<sub>n</sub>; n = 3-10)

| Adsorb             | Sc3   | Sc4   | Sc5   | Sc6   | Sc7   | Sc8   | Sc9   | Sc10  | Ti3   | Ti4   | Ti5   | Ti6   | Ti7   | Ti8   | Ti9   | Ti10  | V3    | V4    | V5    | V6    | V7    | V8    | V9    | V10   |
|--------------------|-------|-------|-------|-------|-------|-------|-------|-------|-------|-------|-------|-------|-------|-------|-------|-------|-------|-------|-------|-------|-------|-------|-------|-------|
| CO <sub>2</sub>    | -3.83 | -3.79 | -4.46 | -3.97 | -4.25 | -4.05 | -4.15 | -4.46 | -3.12 | -2.62 | -2.40 | -2.56 | -2.43 | -2.87 | -3.14 | -3.33 | -1.88 | -1.48 | -2.14 | -1.93 | -1.90 | -1.98 | -1.85 | -1.55 |
| H                  | -0.81 | -0.80 | -0.86 | -0.40 | -0.83 | -0.84 | -0.96 | -0.95 | -0.91 | -0.85 | -0.76 | -0.86 | -0.71 | -0.71 | -0.81 | -0.94 | -0.52 | -0.42 | -0.78 | -0.78 | -0.53 | -0.68 | -0.68 | -0.23 |
| COOH               | -3.00 | -2.73 | -2.49 | -2.55 | -2.40 | -2.59 | -2.93 | -2.47 | -2.60 | -2.03 | -2.06 | -2.10 | -1.92 | -2.34 | -2.32 | -2.51 | -1.23 | -1.18 | -1.60 | -1.80 | -1.28 | -1.49 | -1.46 | -0.75 |
| OOCH               | -3.73 | -3.63 | -3.51 | -3.56 | -3.71 | -3.65 | -4.26 | -3.77 | -2.83 | -2.50 | -2.41 | -2.68 | -2.58 | -2.49 | -2.72 | -2.64 | -2.05 | -2.22 | -2.33 | -2.17 | -2.21 | -2.27 | -2.41 | -1.95 |
| CO                 | -2.96 | -2.76 | -2.55 | -2.56 | -2.96 | -2.98 | -3.11 | -3.36 | -2.33 | -2.12 | -1.96 | -2.33 | -1.70 | -2.34 | -2.26 | -2.61 | -1.30 | -0.84 | -1.54 | -1.57 | -1.33 | -1.39 | -1.20 | -0.76 |
| COHOH              | -0.88 | -0.65 | -0.84 | -0.63 | -0.67 | -0.85 | -0.84 | -0.89 | -0.64 | -0.43 | -0.46 | -0.64 | -0.59 | -0.60 | -0.72 | -0.64 | -0.14 | 0.09  | -0.37 | -0.08 | -0.02 | -0.04 | -0.07 | 0.15  |
| CHO                | -3.33 | -3.26 | -3.00 | -2.72 | -2.91 | -3.05 | -3.16 | -3.06 | -2.76 | -2.47 | -2.48 | -2.40 | -2.25 | -2.21 | -2.49 | -2.90 | -1.51 | -1.27 | -2.13 | -1.99 | -1.73 | -1.40 | -1.43 | -0.77 |
| COH                | -1.62 | -1.14 | -0.97 | -0.86 | -0.80 | -1.11 | -1.07 | -1.46 | -1.13 | -0.93 | -0.89 | -1.72 | -0.77 | -1.26 | -1.34 | -1.66 | -0.79 | -0.94 | -1.10 | -1.62 | -0.69 | -0.30 | -0.59 | 0.35  |
| CH <sub>2</sub> O  | -2.86 | -2.82 | -2.79 | -2.23 | -2.62 | -2.56 | -2.76 | -2.78 | -2.44 | -2.08 | -1.86 | -1.94 | -2.04 | -2.04 | -2.16 | -2.45 | -1.72 | -1.37 | -1.79 | -1.70 | -1.76 | -1.65 | -1.70 | -1.23 |
| C                  | -1.71 | -1.51 | -1.69 | -2.45 | -1.88 | -2.17 | -2.46 | -2.95 | -1.11 | -1.10 | -1.22 | -2.08 | -1.08 | -1.48 | -1.52 | -1.78 | -0.37 | -0.58 | -1.07 | -1.54 | -0.81 | -1.30 | -0.96 | -0.52 |
| CHOH               | -1.13 | -0.88 | -1.31 | -1.05 | -1.25 | -1.32 | -1.35 | -1.47 | -1.40 | -0.75 | -0.84 | -1.13 | -1.09 | -1.08 | -1.17 | -1.02 | -0.81 | -0.26 | -0.34 | -0.66 | -0.42 | -0.44 | -0.38 | -0.20 |
| CH <sub>3</sub> O  | -2.68 | -2.68 | -2.61 | -2.17 | -2.56 | -2.50 | -2.72 | -2.70 | -2.64 | -2.36 | -2.11 | -2.21 | -2.04 | -2.14 | -2.27 | -2.38 | -1.76 | -1.73 | -2.02 | -1.77 | -1.81 | -1.91 | -2.09 | -1.29 |
| CH                 | -2.05 | -1.86 | -1.62 | -1.65 | -1.55 | -1.68 | -1.88 | -2.14 | -1.91 | -1.61 | -1.63 | -2.31 | -1.21 | -1.85 | -2.00 | -2.22 | -1.43 | -1.55 | -1.63 | -1.98 | -0.73 | -1.09 | -1.41 | -0.22 |
| CH <sub>2</sub> OH | -1.41 | -1.28 | -1.26 | -0.89 | -1.21 | -1.19 | -1.38 | -1.37 | -1.62 | -1.25 | -1.05 | -1.22 | -1.01 | -1.20 | -1.22 | -1.26 | -0.87 | -1.02 | -1.25 | -0.96 | -1.10 | -1.12 | -1.18 | -0.58 |
| O                  | -4.96 | -4.88 | -5.06 | -4.84 | -4.91 | -4.98 | -5.06 | -5.15 | -4.82 | -4.21 | -4.32 | -4.64 | -4.39 | -4.26 | -4.47 | -4.59 | -3.97 | -3.23 | -3.60 | -3.41 | -3.27 | -3.17 | -3.20 | -3.03 |
| CH <sub>2</sub>    | -1.89 | -1.84 | -1.92 | -1.44 | -1.75 | -1.76 | -1.80 | -1.87 | -1.96 | -1.59 | -1.72 | -1.82 | -1.52 | -1.55 | -1.79 | -2.04 | -1.61 | -1.23 | -1.64 | -1.43 | -1.25 | -1.15 | -1.29 | -0.88 |
| OH                 | -4.29 | -4.20 | -4.11 | -3.69 | -4.09 | -4.02 | -4.18 | -4.16 | -4.14 | -3.91 | -3.68 | -3.80 | -3.49 | -3.63 | -3.73 | -3.88 | -3.34 | -3.27 | -3.52 | -3.28 | -3.29 | -3.31 | -3.32 | -2.83 |
| CH <sub>3</sub>    | -1.79 | -1.61 | -1.67 | -1.27 | -1.58 | -1.53 | -1.61 | -1.61 | -2.16 | -1.83 | -1.57 | -1.59 | -1.47 | -1.57 | -1.65 | -1.71 | -1.47 | -1.50 | -1.74 | -1.48 | -1.49 | -1.51 | -1.56 | -1.14 |

| Adsorb             | Cr3   | Cr4   | Cr5   | Cr6   | Cr7   | Cr8   | Cr9   | Cr10  | Mn3   | Mn4   | Mn5   | Mn6   | Mn7   | Mn8   | Mn9   | Mn10  | Fe3   | Fe4   | Fe5   | Fe6   | Fe7   | Fe8   | Fe9   | Fe10  |
|--------------------|-------|-------|-------|-------|-------|-------|-------|-------|-------|-------|-------|-------|-------|-------|-------|-------|-------|-------|-------|-------|-------|-------|-------|-------|
| CO <sub>2</sub>    | -1.03 | -1.44 | -1.26 | -1.02 | -1.33 | -0.95 | -1.27 | -1.28 | -1.44 | -0.83 | -1.45 | -1.52 | -1.72 | -1.22 | -1.45 | -2.01 | -1.11 | -1.24 | -0.89 | -0.58 | -0.60 | -1.15 | -0.78 | -0.85 |
| H                  | -0.15 | -0.66 | -0.27 | -0.34 | -0.31 | -0.57 | -0.36 | -0.29 | -0.16 | -0.94 | -0.30 | -0.44 | -1.08 | -0.67 | -0.40 | -1.23 | -0.49 | -1.14 | -0.59 | -0.46 | -0.34 | -0.79 | -0.01 | -0.62 |
| COOH               | -0.70 | -1.22 | -0.93 | -1.05 | -0.82 | -0.63 | -0.81 | -1.02 | -1.05 | -0.53 | -0.74 | -0.79 | -1.44 | -0.98 | -1.11 | -1.43 | -1.02 | -1.15 | -0.74 | -0.50 | -0.44 | -0.91 | -0.50 | -0.85 |
| OOCH               | -2.02 | -2.56 | -2.17 | -2.18 | -1.92 | -1.98 | -1.96 | -1.75 | -1.46 | -1.61 | -1.65 | -1.84 | -2.45 | -1.74 | -1.84 | -2.62 | -1.78 | -1.96 | -1.54 | -1.35 | -1.37 | -1.71 | -1.53 | -1.67 |
| CO                 | -0.15 | -0.74 | -0.71 | -0.66 | -0.64 | -0.48 | -0.85 | -0.72 | -0.77 | -0.83 | -0.82 | -1.27 | -1.69 | -1.21 | -1.07 | -2.00 | -1.06 | -1.24 | -1.17 | -0.93 | -0.69 | -0.99 | -0.64 | -0.85 |
| COHOH              | 0.67  | 0.14  | 0.44  | 0.57  | 0.48  | 0.82  | 0.37  | 0.30  | 0.19  | 0.18  | 0.18  | 0.01  | -0.60 | -0.02 | -0.11 | -0.42 | 0.02  | -0.19 | 0.03  | 0.27  | 0.36  | -0.09 | 0.36  | 0.39  |
| CHO                | -0.28 | -0.77 | -0.42 | -0.47 | -0.52 | -0.52 | -0.88 | -1.01 | -0.50 | -0.64 | -0.84 | -0.75 | -1.56 | -0.71 | -0.85 | -1.51 | -0.67 | -0.83 | -0.56 | -0.16 | -0.21 | -0.53 | -0.12 | -0.46 |
| COH                | 0.49  | -0.22 | -0.10 | 0.06  | 0.00  | 0.26  | -0.21 | -0.09 | -0.06 | -0.16 | -0.13 | -0.37 | -0.73 | -0.17 | -0.15 | -0.98 | -0.26 | -0.87 | -0.62 | -0.19 | 0.13  | 0.00  | 0.09  | -0.26 |
| CH <sub>2</sub> O  | -0.84 | -1.40 | -1.12 | -1.15 | -0.81 | -0.97 | -1.10 | -1.13 | -1.21 | -1.12 | -1.07 | -1.30 | -1.46 | -1.07 | -1.61 | -2.24 | -1.04 | -1.17 | -0.88 | -0.63 | -0.59 | -1.10 | -0.51 | -0.88 |
| C                  | 0.68  | -0.04 | -0.15 | 0.15  | 0.24  | 0.56  | -0.08 | 0.08  | -0.35 | -0.29 | 0.05  | -0.32 | -0.58 | -0.15 | -0.37 | -1.48 | 0.03  | -0.59 | -0.22 | 0.18  | 0.50  | 0.06  | 0.46  | 0.04  |
| CHOH               | 0.47  | -0.12 | -0.04 | 0.16  | -0.08 | -0.04 | -0.07 | -0.07 | 0.10  | -0.13 | -0.27 | -0.20 | -0.77 | -0.22 | -0.26 | -1.11 | -0.41 | -0.67 | -0.07 | 0.18  | 0.03  | -0.16 | 0.17  | 0.11  |
| CH <sub>3</sub> O  | -1.34 | -1.91 | -1.42 | -1.28 | -1.27 | -1.24 | -1.43 | -1.30 | -1.24 | -1.64 | -1.85 | -1.71 | -1.80 | -1.37 | -1.56 | -2.29 | -1.28 | -1.49 | -1.21 | -0.84 | -0.79 | -1.25 | -1.03 | -1.26 |
| CH                 | 0.02  | -0.40 | -0.43 | -0.21 | -0.39 | -0.40 | -0.60 | -0.62 | -0.62 | -0.52 | -0.54 | -0.87 | -1.41 | -0.91 | -0.73 | -1.51 | -0.78 | -1.19 | -0.82 | -0.33 | -0.22 | -0.41 | -0.39 | -0.68 |
| CH <sub>2</sub> OH | -0.73 | -1.22 | -0.80 | -0.76 | -0.66 | -0.71 | -0.76 | -0.87 | -0.57 | -0.59 | -0.88 | -0.70 | -1.31 | -1.03 | -0.85 | -1.56 | -0.80 | -1.00 | -0.58 | -0.36 | -0.30 | -0.72 | -0.44 | -0.73 |
| O                  | -2.57 | -2.65 | -2.59 | -2.26 | -2.48 | -2.43 | -2.93 | -2.94 | -2.35 | -2.50 | -2.62 | -2.66 | -3.32 | -2.68 | -2.59 | -3.63 | -2.43 | -2.29 | -2.01 | -1.78 | -1.85 | -2.05 | -1.93 | -2.25 |
| CH <sub>2</sub>    | -0.80 | -0.71 | -0.67 | -0.50 | -0.60 | -0.27 | -0.55 | -0.76 | -1.01 | -0.81 | -0.93 | -0.75 | -1.20 | -0.84 | -1.11 | -1.52 | -1.10 | -1.21 | -0.79 | -0.42 | -0.56 | -0.67 | -0.45 | -0.56 |
| OH                 | -2.87 | -3.34 | -2.86 | -2.93 | -2.77 | -2.55 | -3.00 | -3.07 | -2.88 | -2.90 | -3.15 | -2.96 | -3.67 | -2.84 | -3.46 | -3.83 | -2.78 | -2.92 | -2.73 | -2.42 | -2.26 | -2.79 | -2.58 | -2.90 |
| CH <sub>3</sub>    | -0.95 | -1.56 | -1.27 | -1.14 | -1.06 | -1.15 | -1.11 | -1.32 | -1.19 | -1.33 | -1.57 | -1.55 | -1.96 | -1.23 | -1.41 | -2.10 | -1.31 | -1.54 | -1.37 | -1.18 | -1.00 | -1.46 | -1.01 | -1.35 |

| Adsorb             | Co3   | Co4   | Co5   | Co6   | Co7   | Co8   | Co9   | Co10  | Ni3   | Ni4   | Ni5   | Ni6   | Ni7   | Ni8   | Ni9   | Ni10  | Cu3   | Cu4   | Cu5   | Cu6   | Cu7   | Cu8   | Cu9   | Cu10  |
|--------------------|-------|-------|-------|-------|-------|-------|-------|-------|-------|-------|-------|-------|-------|-------|-------|-------|-------|-------|-------|-------|-------|-------|-------|-------|
| CO <sub>2</sub>    | -1.31 | -0.78 | -0.75 | -0.32 | -0.75 | -0.67 | -0.85 | -0.68 | -1.19 | -1.28 | -1.11 | -0.72 | -0.65 | -0.72 | -0.55 | -0.57 | -0.44 | -0.30 | -0.35 | -0.05 | 0.14  | -0.03 | -0.18 | -0.05 |
| H                  | -0.57 | -0.49 | -0.43 | -0.54 | -0.27 | -0.17 | -0.20 | -0.46 | -0.36 | -0.86 | -0.53 | -0.82 | -0.34 | -0.44 | -0.26 | -0.23 | -0.38 | -0.25 | -0.87 | -0.21 | -0.36 | 0.31  | -0.39 | -0.07 |
| COOH               | -1.17 | -0.71 | -0.79 | -0.40 | -0.55 | -0.61 | -0.68 | -0.64 | -0.97 | -1.13 | -0.89 | -0.82 | -0.70 | -0.79 | -0.61 | -0.57 | -0.94 | -0.30 | -0.97 | -0.24 | -0.37 | 0.08  | -0.72 | -0.19 |
| OCH                | -1.91 | -1.58 | -1.50 | -1.29 | -1.37 | -1.52 | -1.55 | -1.45 | -1.63 | -1.84 | -1.59 | -1.38 | -1.31 | -1.43 | -1.25 | -1.21 | -1.67 | -0.98 | -1.60 | -0.94 | -1.07 | -0.59 | -1.44 | -0.96 |
| CO                 | -1.33 | -1.23 | -1.27 | -0.65 | -1.12 | -0.88 | -0.98 | -0.97 | -1.45 | -1.42 | -1.50 | -1.29 | -1.01 | -1.12 | -1.10 | -0.90 | -0.84 | -0.82 | -0.66 | -0.58 | -0.32 | -0.33 | -0.40 | -0.37 |
| COHOH              | -0.22 | -0.17 | -0.20 | 0.30  | 0.16  | 0.28  | 0.11  | 0.16  | -0.26 | -0.27 | -0.40 | -0.24 | -0.29 | -0.06 | -0.01 | 0.18  | -0.03 | 0.02  | 0.18  | 0.20  | 0.55  | 0.53  | 0.41  | 0.47  |
| CHO                | -0.89 | -0.43 | -0.52 | 0.02  | -0.32 | -0.29 | -0.35 | -0.29 | -0.63 | -0.75 | -0.64 | -0.38 | -0.34 | -0.47 | -0.31 | -0.23 | -0.38 | 0.28  | -0.31 | 0.42  | 0.18  | 0.65  | -0.12 | 0.37  |
| COH                | -0.41 | -0.06 | -0.40 | 0.38  | 0.29  | 0.38  | 0.18  | 0.11  | -0.57 | -0.46 | -0.61 | -0.43 | -0.25 | -0.29 | -0.27 | -0.30 | 0.54  | 1.13  | 0.47  | 1.08  | 0.95  | 1.46  | 0.79  | 0.91  |
| CH <sub>2</sub> O  | -1.18 | -0.88 | -0.83 | -0.22 | -0.60 | -0.61 | -0.72 | -0.92 | -0.89 | -1.05 | -1.05 | -0.63 | -0.53 | -0.61 | -0.48 | -0.45 | -0.51 | -0.35 | -0.30 | 0.19  | 0.20  | 0.19  | -0.16 | 0.02  |
| C                  | -0.02 | -0.14 | -0.43 | 0.64  | 0.47  | 0.50  | 0.34  | 0.17  | -0.07 | -0.48 | -0.68 | -0.60 | -0.54 | -0.49 | -0.21 | -0.06 | 1.33  | 0.79  | 0.85  | 1.19  | 1.83  | 2.04  | 1.42  | 1.35  |
| CHOH               | 0.01  | -0.09 | -0.05 | 0.29  | -0.19 | 0.32  | 0.13  | -0.19 | -0.55 | -0.51 | -0.20 | -0.14 | -0.07 | -0.16 | 0.03  | -0.03 | 0.11  | 0.26  | -0.04 | 0.40  | 0.69  | 0.92  | 0.31  | 0.46  |
| CH <sub>3</sub> O  | -1.06 | -1.13 | -1.13 | -0.78 | -0.85 | -1.00 | -1.13 | -1.25 | -0.84 | -1.34 | -0.94 | -0.76 | -0.66 | -0.77 | -0.74 | -0.60 | -1.04 | -0.46 | -1.20 | -0.38 | -0.32 | -0.15 | -0.97 | -0.47 |
| CH                 | -0.91 | -0.62 | -0.60 | 0.27  | 0.06  | -0.02 | -0.10 | -0.07 | -1.03 | -1.20 | -1.02 | -0.58 | -0.51 | -0.43 | -0.41 | -0.61 | -0.05 | 0.31  | 0.20  | 0.95  | 0.83  | 1.14  | 0.61  | 0.67  |
| CH <sub>2</sub> OH | -0.98 | -0.68 | -0.68 | -0.33 | -0.50 | -0.45 | -0.56 | -0.55 | -0.88 | -1.06 | -0.80 | -0.65 | -0.58 | -0.63 | -0.44 | -0.43 | -0.83 | -0.20 | -0.79 | -0.12 | -0.35 | 0.14  | -0.65 | -0.15 |
| O                  | -1.95 | -1.63 | -1.56 | -1.15 | -1.48 | -1.31 | -1.73 | -1.99 | -1.36 | -1.55 | -1.45 | -1.45 | -1.21 | -1.33 | -1.31 | -1.52 | -0.70 | -0.54 | -0.75 | -0.61 | -0.47 | -0.55 | -1.11 | -1.25 |
| CH <sub>2</sub>    | -0.97 | -0.78 | -0.67 | -0.21 | -0.46 | -0.36 | -0.70 | -0.66 | -1.08 | -1.05 | -0.89 | -0.50 | -0.38 | -0.50 | -0.50 | -0.49 | -0.44 | -0.36 | -0.47 | -0.31 | 0.15  | 0.19  | -0.14 | -0.25 |
| OH                 | -2.79 | -2.49 | -2.42 | -1.92 | -2.36 | -2.38 | -2.47 | -2.78 | -2.47 | -2.50 | -2.57 | -2.48 | -2.17 | -2.29 | -2.27 | -2.28 | -2.47 | -2.07 | -2.82 | -1.99 | -1.88 | -1.74 | -2.56 | -2.04 |
| CH <sub>3</sub>    | -1.47 | -1.29 | -1.35 | -1.17 | -1.08 | -1.05 | -1.03 | -1.49 | -1.33 | -1.41 | -1.34 | -1.24 | -1.18 | -1.26 | -1.05 | -1.00 | -1.62 | -1.01 | -1.71 | -0.99 | -1.24 | -0.60 | -1.27 | -0.83 |

Table S6: Potential-determining step (PDS) and the free energy change of PDS for different CHO\* and COH\* mediated reaction pathways on all nanoclusters. The PDS step in the red color indicates the lowest energy reaction pathway among all the reaction pathways. Although it seems like many reaction pathways have similar PDS values, there are intermediate steps that will decide the overall lowest energy reaction route.

|      | CHO Path I | RDS                        | CHO Path II | RDS                                      | CHO Path III | RDS                                     | CHO Path IV | RDS                                     | COH Path V | RDS                     | COH Path VI | RDS          | COH Path VII | RDS          |
|------|------------|----------------------------|-------------|------------------------------------------|--------------|-----------------------------------------|-------------|-----------------------------------------|------------|-------------------------|-------------|--------------|--------------|--------------|
| Sc3  | 2.92       | OH* → H <sub>2</sub> O + * | 1.45        | CH <sub>2</sub> O* → CH <sub>2</sub> OH* | 2.20         | CHO* → CHOH*                            | 2.20        | CHO* → CHOH*                            | 1.34       | CO* → COH*              | 1.34        | CO* → COH*   | 1.34         | CO* → COH*   |
| Sc4  | 2.84       | OH* → H <sub>2</sub> O + * | 1.53        | CH <sub>2</sub> O* → CH <sub>2</sub> OH* | 2.37         | CHO* → CHOH*                            | 2.37        | CHO* → CHOH*                            | 1.62       | CO* → COH*              | 1.62        | CO* → COH*   | 1.62         | CO* → COH*   |
| Sc5  | 2.75       | OH* → H <sub>2</sub> O + * | 1.53        | CH <sub>2</sub> O* → CH <sub>2</sub> OH* | 1.69         | CHO* → CHOH*                            | 1.69        | CHO* → CHOH*                            | 1.58       | CO* → COH*              | 1.58        | CO* → COH*   | 1.58         | CO* → COH*   |
| Sc6  | 2.33       | OH* → H <sub>2</sub> O + * | 1.34        | CH <sub>2</sub> O* → CH <sub>2</sub> OH* | 1.67         | CHO* → CHOH*                            | 1.67        | CHO* → CHOH*                            | 1.70       | CO* → COH*              | 1.70        | CO* → COH*   | 1.70         | CO* → COH*   |
| Sc7  | 2.73       | OH* → H <sub>2</sub> O + * | 1.41        | CH <sub>2</sub> O* → CH <sub>2</sub> OH* | 1.65         | CHO* → CHOH*                            | 1.65        | CHO* → CHOH*                            | 2.17       | CO* → COH*              | 2.17        | CO* → COH*   | 2.17         | CO* → COH*   |
| Sc8  | 2.66       | OH* → H <sub>2</sub> O + * | 1.37        | CH <sub>2</sub> O* → CH <sub>2</sub> OH* | 1.72         | CHO* → CHOH*                            | 1.72        | CHO* → CHOH*                            | 1.88       | CO* → COH*              | 1.88        | CO* → COH*   | 1.88         | CO* → COH*   |
| Sc9  | 2.82       | OH* → H <sub>2</sub> O + * | 1.38        | CH <sub>2</sub> O* → CH <sub>2</sub> OH* | 1.81         | CHO* → CHOH*                            | 1.81        | CHO* → CHOH*                            | 2.04       | CO* → COH*              | 2.04        | CO* → COH*   | 2.04         | CO* → COH*   |
| Sc10 | 2.80       | OH* → H <sub>2</sub> O + * | 1.40        | CH <sub>2</sub> O* → CH <sub>2</sub> OH* | 1.60         | CHO* → CHOH*                            | 1.60        | CHO* → CHOH*                            | 1.90       | CO* → COH*              | 1.90        | CO* → COH*   | 1.90         | CO* → COH*   |
| Ti3  | 2.77       | OH* → H <sub>2</sub> O + * | 0.82        | CH <sub>2</sub> O* → CH <sub>2</sub> OH* | 1.36         | CHO* → CHOH*                            | 1.36        | CHO* → CHOH*                            | 1.20       | CO* → COH*              | 1.20        | CO* → COH*   | 1.20         | CO* → COH*   |
| Ti4  | 2.55       | OH* → H <sub>2</sub> O + * | 0.82        | CH <sub>2</sub> O* → CH <sub>2</sub> OH* | 1.72         | CHO* → CHOH*                            | 1.72        | CHO* → CHOH*                            | 1.19       | CO* → COH*              | 1.19        | CO* → COH*   | 1.19         | CO* → COH*   |
| Ti5  | 2.32       | OH* → H <sub>2</sub> O + * | 0.81        | CH <sub>2</sub> O* → CH <sub>2</sub> OH* | 1.64         | CHO* → CHOH*                            | 1.64        | CHO* → CHOH*                            | 1.07       | CO* → COH*              | 1.07        | CO* → COH*   | 1.07         | CO* → COH*   |
| Ti6  | 2.44       | OH* → H <sub>2</sub> O + * | 0.73        | CH <sub>2</sub> O* → CH <sub>2</sub> OH* | 1.27         | CHO* → CHOH*                            | 1.27        | CHO* → CHOH*                            | 0.61       | CO* → COH*              | 0.61        | CO* → COH*   | 0.61         | CO* → COH*   |
| Ti7  | 2.13       | OH* → H <sub>2</sub> O + * | 1.03        | CH <sub>2</sub> O* → CH <sub>2</sub> OH* | 1.16         | CHO* → CHOH*                            | 1.16        | CHO* → CHOH*                            | 0.93       | CO* → COH*              | 0.93        | CO* → COH*   | 0.93         | CO* → COH*   |
| Ti8  | 2.27       | OH* → H <sub>2</sub> O + * | 0.84        | CH <sub>2</sub> O* → CH <sub>2</sub> OH* | 1.13         | CHO* → CHOH*                            | 1.13        | CHO* → CHOH*                            | 1.08       | CO* → COH*              | 1.08        | CO* → COH*   | 1.08         | CO* → COH*   |
| Ti9  | 2.37       | OH* → H <sub>2</sub> O + * | 0.94        | CH <sub>2</sub> O* → CH <sub>2</sub> OH* | 1.32         | CHO* → CHOH*                            | 1.32        | CHO* → CHOH*                            | 0.92       | CO* → COH*              | 0.92        | CO* → COH*   | 0.92         | CO* → COH*   |
| Ti10 | 2.52       | OH* → H <sub>2</sub> O + * | 1.19        | CH <sub>2</sub> O* → CH <sub>2</sub> OH* | 1.88         | CHO* → CHOH*                            | 1.88        | CHO* → CHOH*                            | 0.95       | CO* → COH*              | 0.95        | CO* → COH*   | 0.95         | CO* → COH*   |
| V3   | 1.98       | OH* → H <sub>2</sub> O + * | 0.85        | CH <sub>2</sub> O* → CH <sub>2</sub> OH* | 0.70         | CHO* → CHOH*                            | 0.70        | CHO* → CHOH*                            | 0.51       | CO* → COH*              | 0.51        | CO* → COH*   | 0.51         | CO* → COH*   |
| V4   | 1.91       | OH* → H <sub>2</sub> O + * | 0.35        | CH <sub>2</sub> O* → CH <sub>2</sub> OH* | 1.01         | CHO* → CHOH*                            | 1.01        | CHO* → CHOH*                            | 0.36       | COH* → C*               | 0.68        | COH* → CHOH* | 0.68         | COH* → CHOH* |
| V5   | 2.16       | OH* → H <sub>2</sub> O + * | 0.55        | CH <sub>2</sub> O* → CH <sub>2</sub> OH* | 1.78         | CHO* → CHOH*                            | 1.78        | CHO* → CHOH*                            | 0.44       | CO* → COH*              | 0.75        | COH* → CHOH* | 0.75         | COH* → CHOH* |
| V6   | 1.92       | OH* → H <sub>2</sub> O + * | 0.74        | CH <sub>2</sub> O* → CH <sub>2</sub> OH* | 1.34         | CHO* → CHOH*                            | 1.34        | CHO* → CHOH*                            | 0.55       | CH* → CH <sub>2</sub> * | 0.96        | COH* → CHOH* | 0.96         | COH* → CHOH* |
| V7   | 1.93       | OH* → H <sub>2</sub> O + * | 0.66        | CH <sub>2</sub> O* → CH <sub>2</sub> OH* | 1.31         | CHO* → CHOH*                            | 1.31        | CHO* → CHOH*                            | 0.64       | CO* → COH*              | 0.64        | CO* → COH*   | 0.64         | CO* → COH*   |
| V8   | 1.94       | OH* → H <sub>2</sub> O + * | 0.53        | CH <sub>2</sub> O* → CH <sub>2</sub> OH* | 0.95         | CHO* → CHOH*                            | 0.95        | CHO* → CHOH*                            | 1.10       | CO* → COH*              | 1.10        | CO* → COH*   | 1.10         | CO* → COH*   |
| V9   | 1.96       | OH* → H <sub>2</sub> O + * | 0.53        | CH <sub>2</sub> O* → CH <sub>2</sub> OH* | 1.05         | CHO* → CHOH*                            | 1.05        | CHO* → CHOH*                            | 0.61       | CO* → COH*              | 0.61        | CO* → COH*   | 0.61         | CO* → COH*   |
| V10  | 1.47       | OH* → H <sub>2</sub> O + * | 0.66        | CH <sub>2</sub> O* → CH <sub>2</sub> OH* | 0.58         | CHO* → CHOH*                            | 0.58        | CHO* → CHOH*                            | 1.11       | CO* → COH*              | 1.11        | CO* → COH*   | 1.11         | CO* → COH*   |
| Cr3  | 1.51       | OH* → H <sub>2</sub> O + * | 0.56        | COOH* → CO*                              | 0.75         | CHO* → CHOH*                            | 0.75        | CHO* → CHOH*                            | 0.64       | CO* → COH*              | 0.64        | CO* → COH*   | 0.64         | CO* → COH*   |
| Cr4  | 1.98       | OH* → H <sub>2</sub> O + * | 0.51        | CH <sub>2</sub> OH* → CH <sub>2</sub> *  | 0.66         | CHO* → CHOH*                            | 0.66        | CHO* → CHOH*                            | 0.51       | CO* → COH*              | 0.51        | CO* → COH*   | 0.51         | CO* → COH*   |
| Cr5  | 1.50       | OH* → H <sub>2</sub> O + * | 0.32        | CH <sub>2</sub> O* → CH <sub>2</sub> OH* | 0.38         | CHO* → CHOH*                            | 0.38        | CHO* → CHOH*                            | 0.61       | CO* → COH*              | 0.61        | CO* → COH*   | 0.61         | CO* → COH*   |
| Cr6  | 1.57       | OH* → H <sub>2</sub> O + * | 0.40        | CH <sub>2</sub> O* → CH <sub>2</sub> OH* | 0.63         | CHO* → CHOH*                            | 0.63        | CHO* → CHOH*                            | 0.71       | CO* → COH*              | 0.71        | CO* → COH*   | 0.71         | CO* → COH*   |
| Cr7  | 1.41       | OH* → H <sub>2</sub> O + * | 0.18        | COOH* → CO*                              | 0.44         | CHO* → CHOH*                            | 0.44        | CHO* → CHOH*                            | 0.64       | CO* → COH*              | 0.64        | CO* → COH*   | 0.64         | CO* → COH*   |
| Cr8  | 1.18       | OH* → H <sub>2</sub> O + * | 0.44        | CH <sub>2</sub> OH* → CH <sub>2</sub> *  | 0.48         | CHO* → CHOH*                            | 0.48        | CHO* → CHOH*                            | 0.74       | CO* → COH*              | 0.74        | CO* → COH*   | 0.74         | CO* → COH*   |
| Cr9  | 1.64       | OH* → H <sub>2</sub> O + * | 0.35        | CH <sub>2</sub> O* → CH <sub>2</sub> OH* | 0.81         | CHO* → CHOH*                            | 0.81        | CHO* → CHOH*                            | 0.64       | CO* → COH*              | 0.64        | CO* → COH*   | 0.64         | CO* → COH*   |
| Cr10 | 1.71       | OH* → H <sub>2</sub> O + * | 0.29        | COOH* → CO*                              | 0.94         | CHO* → CHOH*                            | 0.94        | CHO* → CHOH*                            | 0.63       | CO* → COH*              | 0.63        | CO* → COH*   | 0.63         | CO* → COH*   |
| Mn3  | 1.52       | OH* → H <sub>2</sub> O + * | 0.64        | CH <sub>2</sub> O* → CH <sub>2</sub> OH* | 0.59         | CHO* → CHOH*                            | 0.59        | CHO* → CHOH*                            | 0.70       | CO* → COH*              | 0.70        | CO* → COH*   | 0.70         | CO* → COH*   |
| Mn4  | 1.54       | OH* → H <sub>2</sub> O + * | 0.53        | CH <sub>2</sub> O* → CH <sub>2</sub> OH* | 0.50         | CHO* → CHOH*                            | 0.50        | CHO* → CHOH*                            | 0.67       | CO* → COH*              | 0.67        | CO* → COH*   | 0.67         | CO* → COH*   |
| Mn5  | 1.79       | OH* → H <sub>2</sub> O + * | 0.21        | CH <sub>3</sub> * → CH <sub>4</sub> + *  | 0.57         | CHO* → CHOH*                            | 0.57        | CHO* → CHOH*                            | 0.69       | CO* → COH*              | 0.69        | CO* → COH*   | 0.69         | CO* → COH*   |
| Mn6  | 1.59       | OH* → H <sub>2</sub> O + * | 0.60        | CH <sub>2</sub> O* → CH <sub>2</sub> OH* | 0.55         | CHO* → CHOH*                            | 0.55        | CHO* → CHOH*                            | 0.90       | CO* → COH*              | 0.90        | CO* → COH*   | 0.90         | CO* → COH*   |
| Mn7  | 2.31       | OH* → H <sub>2</sub> O + * | 0.60        | CH <sub>3</sub> * → CH <sub>4</sub> + *  | 0.79         | CHO* → CHOH*                            | 0.79        | CHO* → CHOH*                            | 0.96       | CO* → COH*              | 0.96        | CO* → COH*   | 0.96         | CO* → COH*   |
| Mn8  | 1.47       | OH* → H <sub>2</sub> O + * | 0.49        | CO* → CHO*                               | 0.49         | CO* → CHO*                              | 0.49        | CO* → CHO*                              | 1.04       | CO* → COH*              | 1.04        | CO* → COH*   | 1.04         | CO* → COH*   |
| Mn9  | 2.10       | OH* → H <sub>2</sub> O + * | 0.75        | CH <sub>2</sub> O* → CH <sub>2</sub> OH* | 0.58         | CHO* → CHOH*                            | 0.58        | CHO* → CHOH*                            | 0.92       | CO* → COH*              | 0.92        | CO* → COH*   | 0.92         | CO* → COH*   |
| Mn10 | 2.46       | OH* → H <sub>2</sub> O + * | 0.74        | CH <sub>3</sub> * → CH <sub>4</sub> + *  | 0.74         | CH <sub>3</sub> * → CH <sub>4</sub> + * | 0.74        | CH <sub>3</sub> * → CH <sub>4</sub> + * | 1.01       | CO* → COH*              | 1.01        | CO* → COH*   | 1.01         | CO* → COH*   |
| Fe3  | 1.42       | OH* → H <sub>2</sub> O + * | 0.38        | CO* → CHO*                               | 0.38         | CO* → CHO*                              | 0.38        | CO* → CHO*                              | 0.79       | CO* → COH*              | 0.79        | CO* → COH*   | 0.79         | CO* → COH*   |
| Fe4  | 1.55       | OH* → H <sub>2</sub> O + * | 0.40        | CO* → CHO*                               | 0.40         | CO* → CHO*                              | 0.40        | CO* → CHO*                              | 0.37       | CO* → COH*              | 0.37        | CO* → COH*   | 0.37         | CO* → COH*   |
| Fe5  | 1.37       | OH* → H <sub>2</sub> O + * | 0.61        | CO* → CHO*                               | 0.61         | CO* → CHO*                              | 0.61        | CO* → CHO*                              | 0.55       | CO* → COH*              | 0.55        | COH* → CHOH* | 0.55         | COH* → CHOH* |
| Fe6  | 1.06       | OH* → H <sub>2</sub> O + * | 0.77        | CO* → CHO*                               | 0.77         | CO* → CHO*                              | 0.77        | CO* → CHO*                              | 0.75       | CO* → COH*              | 0.75        | CO* → COH*   | 0.75         | CO* → COH*   |
| Fe7  | 0.89       | OH* → H <sub>2</sub> O + * | 0.48        | CO* → CHO*                               | 0.48         | CO* → CHO*                              | 0.48        | CO* → CHO*                              | 0.81       | CO* → COH*              | 0.81        | CO* → COH*   | 0.81         | CO* → COH*   |

|      |      |                            |      |                                         |      |                                         |        |              |      |            |      |            |      |            |
|------|------|----------------------------|------|-----------------------------------------|------|-----------------------------------------|--------|--------------|------|------------|------|------------|------|------------|
| Fe8  | 1.43 | OH* → H <sub>2</sub> O + * | 0.46 | CO* → CHO*                              | 0.46 | CO* → CHO*                              | 0.46   | CO* → CHO*   | 0.99 | CO* → COH* | 0.99 | CO* → COH* | 0.99 | CO* → COH* |
| Fe9  | 1.22 | OH* → H <sub>2</sub> O + * | 0.52 | CO* → CHO*                              | 0.52 | CO* → CHO*                              | 0.52   | CO* → CHO*   | 0.73 | CO* → COH* | 0.73 | CO* → COH* | 0.73 | CO* → COH* |
| Fe10 | 1.54 | OH* → H <sub>2</sub> O + * | 0.39 | CO* → CHO*                              | 0.57 | CHO* → CHOH*                            | 0.57   | CHO* → CHOH* | 0.59 | CO* → COH* | 0.59 | CO* → COH* | 0.59 | CO* → COH* |
| Co3  | 1.43 | OH* → H <sub>2</sub> O + * | 0.44 | CO* → CHO*                              | 0.90 | CHO* → CHOH*                            | 0.90   | CHO* → CHOH* | 0.93 | CO* → COH* | 0.93 | CO* → COH* | 0.93 | CO* → COH* |
| Co4  | 1.12 | OH* → H <sub>2</sub> O + * | 0.80 | CO* → CHO*                              | 0.80 | CO* → CHO*                              | 0.80   | CO* → CHO*   | 1.17 | CO* → COH* | 1.17 | CO* → COH* | 1.17 | CO* → COH* |
| Co5  | 1.06 | OH* → H <sub>2</sub> O + * | 0.75 | CO* → CHO*                              | 0.75 | CO* → CHO*                              | 0.75   | CO* → CHO*   | 0.87 | CO* → COH* | 0.87 | CO* → COH* | 0.87 | CO* → COH* |
| Co6  | 0.67 | CO* → CHO*                 | 0.67 | CO* → CHO*                              | 0.67 | CO* → CHO*                              | 0.67   | CO* → CHO*   | 1.03 | CO* → COH* | 1.03 | CO* → COH* | 1.03 | CO* → COH* |
| Co7  | 1.00 | OH* → H <sub>2</sub> O + * | 0.80 | CO* → CHO*                              | 0.80 | CO* → CHO*                              | 0.80   | CO* → CHO*   | 1.41 | CO* → COH* | 1.41 | CO* → COH* | 1.41 | CO* → COH* |
| Co8  | 1.02 | OH* → H <sub>2</sub> O + * | 0.59 | CO* → CHO*                              | 0.61 | CHO* → CHOH*                            | 0.61   | CHO* → CHOH* | 1.26 | CO* → COH* | 1.26 | CO* → COH* | 1.26 | CO* → COH* |
| Co9  | 1.10 | OH* → H <sub>2</sub> O + * | 0.62 | CO* → CHO*                              | 0.62 | CO* → CHO*                              | 0.62   | CO* → CHO*   | 1.16 | CO* → COH* | 1.16 | CO* → COH* | 1.16 | CO* → COH* |
| Co10 | 1.41 | OH* → H <sub>2</sub> O + * | 0.68 | CO* → CHO*                              | 0.68 | CO* → CHO*                              | 0.68   | CO* → CHO*   | 1.08 | CO* → COH* | 1.08 | CO* → COH* | 1.08 | CO* → COH* |
| Ni3  | 1.11 | OH* → H <sub>2</sub> O + * | 0.82 | CO* → CHO*                              | 0.82 | CO* → CHO*                              | 0.82   | CO* → CHO*   | 0.88 | CO* → COH* | 0.88 | CO* → COH* | 0.88 | CO* → COH* |
| Ni4  | 1.14 | OH* → H <sub>2</sub> O + * | 0.66 | CO* → CHO*                              | 0.66 | CO* → CHO*                              | 0.66   | CO* → CHO*   | 0.95 | CO* → COH* | 0.95 | CO* → COH* | 0.95 | CO* → COH* |
| Ni5  | 1.21 | OH* → H <sub>2</sub> O + * | 0.86 | CO* → CHO*                              | 0.86 | CO* → CHO*                              | 0.86   | CO* → CHO*   | 0.89 | CO* → COH* | 0.89 | CO* → COH* | 0.89 | CO* → COH* |
| Ni6  | 1.11 | OH* → H <sub>2</sub> O + * | 0.91 | CO* → CHO*                              | 0.91 | CO* → CHO*                              | 0.91   | CO* → CHO*   | 0.86 | CO* → COH* | 0.86 | CO* → COH* | 0.86 | CO* → COH* |
| Ni7  | 0.81 | OH* → H <sub>2</sub> O + * | 0.67 | CO* → CHO*                              | 0.67 | CO* → CHO*                              | 0.67   | CO* → CHO*   | 0.76 | CO* → COH* | 0.76 | CO* → COH* | 0.76 | CO* → COH* |
| Ni8  | 0.93 | OH* → H <sub>2</sub> O + * | 0.65 | CO* → CHO*                              | 0.65 | CO* → CHO*                              | 0.65   | CO* → CHO*   | 0.83 | CO* → COH* | 0.83 | CO* → COH* | 0.83 | CO* → COH* |
| Ni9  | 0.91 | OH* → H <sub>2</sub> O + * | 0.79 | CO* → CHO*                              | 0.79 | CO* → CHO*                              | 0.79   | CO* → CHO*   | 0.83 | CO* → COH* | 0.83 | CO* → COH* | 0.83 | CO* → COH* |
| Ni10 | 0.92 | OH* → H <sub>2</sub> O + * | 0.67 | CO* → CHO*                              | 0.67 | CO* → CHO*                              | 0.67   | CO* → CHO*   | 0.60 | CO* → COH* | 0.60 | CO* → COH* | 0.60 | CO* → COH* |
| Cu3  | 1.11 | OH* → H <sub>2</sub> O + * | 0.46 | CO* → CHO*                              | 0.49 | CHO* → CHOH*                            | 0.49   | CHO* → CHOH* | 1.38 | CO* → COH* | 1.38 | CO* → COH* | 1.38 | CO* → COH* |
| Cu4  | 1.10 | CO* → CHO*                 | 1.10 | CO* → CHO*                              | 1.10 | CO* → CHO*                              | 1.10   | CO* → CHO*   | 1.95 | CO* → COH* | 1.95 | CO* → COH* | 1.95 | CO* → COH* |
| Cu5  | 1.45 | OH* → H <sub>2</sub> O + * | 0.36 | CO* → CHO*                              | 0.36 | CO* → CHO*                              | 0.36   | CO* → CHO*   | 1.14 | CO* → COH* | 1.14 | CO* → COH* | 1.14 | CO* → COH* |
| Cu6  | 1.00 | CO* → CHO*                 | 1.00 | CO* → CHO*                              | 1.00 | CO* → CHO*                              | 1.00   | CO* → CHO*   | 1.66 | CO* → COH* | 1.66 | CO* → COH* | 1.66 | CO* → COH* |
| Cu7  | 0.52 | OH* → H <sub>2</sub> O + * | 0.50 | CO* → CHO*                              | 0.50 | CHO* → CHOH*                            | 0.50   | CHO* → CHOH* | 1.27 | CO* → COH* | 1.27 | CO* → COH* | 1.27 | CO* → COH* |
| Cu8  | 0.98 | CO* → CHO*                 | 0.98 | CO* → CHO*                              | 0.98 | CO* → CHO*                              | 0.98   | CO* → CHO*   | 1.79 | CO* → COH* | 1.79 | CO* → COH* | 1.79 | CO* → COH* |
| Cu9  | 1.20 | OH* → H <sub>2</sub> O + * | 0.51 | CH <sub>2</sub> OH* → CH <sub>2</sub> * | 0.51 | CH <sub>2</sub> OH* → CH <sub>2</sub> * | 0.43   | CHO* → CHOH* | 1.19 | CO* → COH* | 1.19 | CO* → COH* | 1.19 | CO* → COH* |
| Cu10 | 0.75 | CO* → CHO*                 | 0.75 | CO* → CHO*                              | 0.75 | CO* → CHO*                              | 0.7472 | CO* → CHO*   | 1.28 | CO* → COH* | 1.28 | CO* → COH* | 1.28 | CO* → COH* |

|      | CHO<br>Path VIII |                                             | CHO<br>Path IX |                                              | CHO<br>Path X |                                              | COH<br>Path XI |                                              |
|------|------------------|---------------------------------------------|----------------|----------------------------------------------|---------------|----------------------------------------------|----------------|----------------------------------------------|
|      | RDS              |                                             | RDS            |                                              | RDS           |                                              | RDS            |                                              |
| Sc3  | 2.56             | CH <sub>3</sub> O* → CH <sub>3</sub> OH + * | 1.45           | CH <sub>2</sub> O* → CH <sub>2</sub> OH*     | 2.20          | CHO* → CHOH*                                 | 1.34           | CO* → COH*                                   |
| Sc4  | 2.56             | CH <sub>3</sub> O* → CH <sub>3</sub> OH + * | 1.53           | CH <sub>2</sub> O* → CH <sub>2</sub> OH*     | 2.37          | CHO* → CHOH*                                 | 1.62           | CO* → COH*                                   |
| Sc5  | 2.50             | CH <sub>3</sub> O* → CH <sub>3</sub> OH + * | 1.53           | CH <sub>2</sub> O* → CH <sub>2</sub> OH*     | 1.69          | CHO* → CHOH*                                 | 1.58           | CO* → COH*                                   |
| Sc6  | 2.05             | CH <sub>3</sub> O* → CH <sub>3</sub> OH + * | 1.34           | CH <sub>2</sub> O* → CH <sub>2</sub> OH*     | 1.67          | CHO* → CHOH*                                 | 1.70           | CO* → COH*                                   |
| Sc7  | 2.44             | CH <sub>3</sub> O* → CH <sub>3</sub> OH + * | 1.41           | CH <sub>2</sub> O* → CH <sub>2</sub> OH*     | 1.65          | CHO* → CHOH*                                 | 2.17           | CO* → COH*                                   |
| Sc8  | 2.39             | CH <sub>3</sub> O* → CH <sub>3</sub> OH + * | 1.37           | CH <sub>2</sub> O* → CH <sub>2</sub> OH*     | 1.72          | CHO* → CHOH*                                 | 1.88           | CO* → COH*                                   |
| Sc9  | 2.60             | CH <sub>3</sub> O* → CH <sub>3</sub> OH + * | 1.38           | CH <sub>2</sub> O* → CH <sub>2</sub> OH*     | 1.81          | CHO* → CHOH*                                 | 2.04           | CO* → COH*                                   |
| Sc10 | 2.58             | CH <sub>3</sub> O* → CH <sub>3</sub> OH + * | 1.40           | CH <sub>2</sub> O* → CH <sub>2</sub> OH*     | 1.60          | CHO* → CHOH*                                 | 1.90           | CO* → COH*                                   |
| Ti3  | 2.53             | CH <sub>3</sub> O* → CH <sub>3</sub> OH + * | 1.51           | CH <sub>2</sub> OH* → CH <sub>3</sub> OH + * | 1.51          | CH <sub>2</sub> OH* → CH <sub>3</sub> OH + * | 1.51           | CH <sub>2</sub> OH* → CH <sub>3</sub> OH + * |
| Ti4  | 2.24             | CH <sub>3</sub> O* → CH <sub>3</sub> OH + * | 1.14           | CH <sub>2</sub> OH* → CH <sub>3</sub> OH + * | 1.72          | CHO* → CHOH*                                 | 1.19           | CO* → COH*                                   |
| Ti5  | 1.99             | CH <sub>3</sub> O* → CH <sub>3</sub> OH + * | 0.94           | CH <sub>2</sub> OH* → CH <sub>3</sub> OH + * | 1.64          | CHO* → CHOH*                                 | 1.07           | CO* → COH*                                   |
| Ti6  | 2.09             | CH <sub>3</sub> O* → CH <sub>3</sub> OH + * | 1.10           | CH <sub>2</sub> OH* → CH <sub>3</sub> OH + * | 1.27          | CHO* → CHOH*                                 | 1.10           | CH <sub>2</sub> OH* → CH <sub>3</sub> OH + * |
| Ti7  | 1.92             | CH <sub>3</sub> O* → CH <sub>3</sub> OH + * | 1.03           | CH <sub>2</sub> O* → CH <sub>2</sub> OH*     | 1.16          | CHO* → CHOH*                                 | 0.93           | CO* → COH*                                   |
| Ti8  | 2.02             | CH <sub>3</sub> O* → CH <sub>3</sub> OH + * | 1.09           | CH <sub>2</sub> OH* → CH <sub>3</sub> OH + * | 1.13          | CHO* → CHOH*                                 | 1.09           | CH <sub>2</sub> OH* → CH <sub>3</sub> OH + * |
| Ti9  | 2.15             | CH <sub>3</sub> O* → CH <sub>3</sub> OH + * | 1.11           | CH <sub>2</sub> OH* → CH <sub>3</sub> OH + * | 1.32          | CHO* → CHOH*                                 | 1.11           | CH <sub>2</sub> OH* → CH <sub>3</sub> OH + * |
| Ti10 | 2.26             | CH <sub>3</sub> O* → CH <sub>3</sub> OH + * | 1.19           | CH <sub>2</sub> O* → CH <sub>2</sub> OH*     | 1.88          | CHO* → CHOH*                                 | 1.14           | CH <sub>2</sub> OH* → CH <sub>3</sub> OH + * |
| V3   | 1.64             | CH <sub>3</sub> O* → CH <sub>3</sub> OH + * | 0.85           | CH <sub>2</sub> O* → CH <sub>2</sub> OH*     | 0.75          | CH <sub>2</sub> OH* → CH <sub>3</sub> OH + * | 0.75           | CH <sub>2</sub> OH* → CH <sub>3</sub> OH + * |
| V4   | 1.61             | CH <sub>3</sub> O* → CH <sub>3</sub> OH + * | 0.90           | CH <sub>2</sub> OH* → CH <sub>3</sub> OH + * | 1.01          | CHO* → CHOH*                                 | 0.90           | CH <sub>2</sub> OH* → CH <sub>3</sub> OH + * |
| V5   | 1.90             | CH <sub>3</sub> O* → CH <sub>3</sub> OH + * | 1.13           | CH <sub>2</sub> OH* → CH <sub>3</sub> OH + * | 1.78          | CHO* → CHOH*                                 | 1.13           | CH <sub>2</sub> OH* → CH <sub>3</sub> OH + * |
| V6   | 1.65             | CH <sub>3</sub> O* → CH <sub>3</sub> OH + * | 0.84           | CH <sub>2</sub> OH* → CH <sub>3</sub> OH + * | 1.34          | CHO* → CHOH*                                 | 0.96           | COH* → CHOH*                                 |
| V7   | 1.69             | CH <sub>3</sub> O* → CH <sub>3</sub> OH + * | 0.98           | CH <sub>2</sub> OH* → CH <sub>3</sub> OH + * | 1.31          | CHO* → CHOH*                                 | 0.98           | CH <sub>2</sub> OH* → CH <sub>3</sub> OH + * |
| V8   | 1.79             | CH <sub>3</sub> O* → CH <sub>3</sub> OH + * | 1.00           | CH <sub>2</sub> OH* → CH <sub>3</sub> OH + * | 1.00          | CH <sub>2</sub> OH* → CH <sub>3</sub> OH + * | 1.10           | CO* → COH*                                   |
| V9   | 1.98             | CH <sub>3</sub> O* → CH <sub>3</sub> OH + * | 1.06           | CH <sub>2</sub> OH* → CH <sub>3</sub> OH + * | 1.06          | CH <sub>2</sub> OH* → CH <sub>3</sub> OH + * | 1.06           | CH <sub>2</sub> OH* → CH <sub>3</sub> OH + * |
| V10  | 1.17             | CH <sub>3</sub> O* → CH <sub>3</sub> OH + * | 0.66           | CH <sub>2</sub> O* → CH <sub>2</sub> OH*     | 0.58          | CHO* → CHOH*                                 | 1.11           | CO* → COH*                                   |
| Cr3  | 1.22             | CH <sub>3</sub> O* → CH <sub>3</sub> OH + * | 0.61           | CH <sub>2</sub> OH* → CH <sub>3</sub> OH + * | 0.75          | CHO* → CHOH*                                 | 0.64           | CO* → COH*                                   |
| Cr4  | 1.79             | CH <sub>3</sub> O* → CH <sub>3</sub> OH + * | 1.10           | CH <sub>2</sub> OH* → CH <sub>3</sub> OH + * | 1.10          | CH <sub>2</sub> OH* → CH <sub>3</sub> OH + * | 1.10           | CH <sub>2</sub> OH* → CH <sub>3</sub> OH + * |
| Cr5  | 1.30             | CH <sub>3</sub> O* → CH <sub>3</sub> OH + * | 0.69           | CH <sub>2</sub> OH* → CH <sub>3</sub> OH + * | 0.69          | CH <sub>2</sub> OH* → CH <sub>3</sub> OH + * | 0.69           | CH <sub>2</sub> OH* → CH <sub>3</sub> OH + * |
| Cr6  | 1.16             | CH <sub>3</sub> O* → CH <sub>3</sub> OH + * | 0.64           | CH <sub>2</sub> OH* → CH <sub>3</sub> OH + * | 0.64          | CH <sub>2</sub> OH* → CH <sub>3</sub> OH + * | 0.71           | CO* → COH*                                   |
| Cr7  | 1.16             | CH <sub>3</sub> O* → CH <sub>3</sub> OH + * | 0.54           | CH <sub>2</sub> OH* → CH <sub>3</sub> OH + * | 0.54          | CH <sub>2</sub> OH* → CH <sub>3</sub> OH + * | 0.64           | CO* → COH*                                   |
| Cr8  | 1.12             | CH <sub>3</sub> O* → CH <sub>3</sub> OH + * | 0.59           | CH <sub>2</sub> OH* → CH <sub>3</sub> OH + * | 0.59          | CH <sub>2</sub> OH* → CH <sub>3</sub> OH + * | 0.74           | CO* → COH*                                   |
| Cr9  | 1.31             | CH <sub>3</sub> O* → CH <sub>3</sub> OH + * | 0.64           | CH <sub>2</sub> OH* → CH <sub>3</sub> OH + * | 0.81          | CHO* → CHOH*                                 | 0.64           | CH <sub>2</sub> OH* → CH <sub>3</sub> OH + * |
| Cr10 | 1.18             | CH <sub>3</sub> O* → CH <sub>3</sub> OH + * | 0.75           | CH <sub>2</sub> OH* → CH <sub>3</sub> OH + * | 0.94          | CHO* → CHOH*                                 | 0.75           | CH <sub>2</sub> OH* → CH <sub>3</sub> OH + * |
| Mn3  | 1.12             | CH <sub>3</sub> O* → CH <sub>3</sub> OH + * | 0.64           | CH <sub>2</sub> O* → CH <sub>2</sub> OH*     | 0.59          | CHO* → CHOH*                                 | 0.70           | CO* → COH*                                   |
| Mn4  | 1.52             | CH <sub>3</sub> O* → CH <sub>3</sub> OH + * | 0.53           | CH <sub>2</sub> O* → CH <sub>2</sub> OH*     | 0.50          | CHO* → CHOH*                                 | 0.67           | CO* → COH*                                   |
| Mn5  | 1.73             | CH <sub>3</sub> O* → CH <sub>3</sub> OH + * | 0.77           | CH <sub>2</sub> OH* → CH <sub>3</sub> OH + * | 0.77          | CH <sub>2</sub> OH* → CH <sub>3</sub> OH + * | 0.77           | CH <sub>2</sub> OH* → CH <sub>3</sub> OH + * |
| Mn6  | 1.59             | CH <sub>3</sub> O* → CH <sub>3</sub> OH + * | 0.60           | CH <sub>2</sub> O* → CH <sub>2</sub> OH*     | 0.59          | CH <sub>2</sub> OH* → CH <sub>3</sub> OH + * | 0.90           | CO* → COH*                                   |
| Mn7  | 1.68             | CH <sub>3</sub> O* → CH <sub>3</sub> OH + * | 1.19           | CH <sub>2</sub> OH* → CH <sub>3</sub> OH + * | 1.19          | CH <sub>2</sub> OH* → CH <sub>3</sub> OH + * | 1.19           | CH <sub>2</sub> OH* → CH <sub>3</sub> OH + * |
| Mn8  | 1.25             | CH <sub>3</sub> O* → CH <sub>3</sub> OH + * | 0.91           | CH <sub>2</sub> OH* → CH <sub>3</sub> OH + * | 0.91          | CH <sub>2</sub> OH* → CH <sub>3</sub> OH + * | 1.04           | CO* → COH*                                   |
| Mn9  | 1.45             | CH <sub>3</sub> O* → CH <sub>3</sub> OH + * | 0.75           | CH <sub>2</sub> O* → CH <sub>2</sub> OH*     | 0.74          | CH <sub>2</sub> OH* → CH <sub>3</sub> OH + * | 0.92           | CO* → COH*                                   |
| Mn10 | 2.17             | CH <sub>3</sub> O* → CH <sub>3</sub> OH + * | 1.44           | CH <sub>2</sub> OH* → CH <sub>3</sub> OH + * | 1.44          | CH <sub>2</sub> OH* → CH <sub>3</sub> OH + * | 1.44           | CH <sub>2</sub> OH* → CH <sub>3</sub> OH + * |
| Fe3  | 1.16             | CH <sub>3</sub> O* → CH <sub>3</sub> OH + * | 0.69           | CH <sub>2</sub> OH* → CH <sub>3</sub> OH + * | 0.69          | CH <sub>2</sub> OH* → CH <sub>3</sub> OH + * | 0.79           | CO* → COH*                                   |
| Fe4  | 1.37             | CH <sub>3</sub> O* → CH <sub>3</sub> OH + * | 0.88           | CH <sub>2</sub> OH* → CH <sub>3</sub> OH + * | 0.88          | CH <sub>2</sub> OH* → CH <sub>3</sub> OH + * | 0.88           | CH <sub>2</sub> OH* → CH <sub>3</sub> OH + * |
| Fe5  | 1.10             | CH <sub>3</sub> O* → CH <sub>3</sub> OH + * | 0.61           | CO* → CHO*                                   | 0.61          | CO* → CHO*                                   | 0.55           | COH* → CHOH*                                 |
| Fe6  | 0.77             | CO* → CHO*                                  | 0.77           | CO* → CHO*                                   | 0.77          | CO* → CHO*                                   | 0.75           | CO* → COH*                                   |
| Fe7  | 0.67             | CH <sub>3</sub> O* → CH <sub>3</sub> OH + * | 0.48           | CO* → CHO*                                   | 0.48          | CO* → CHO*                                   | 0.81           | CO* → COH*                                   |





## References:

- (1) Donald R. Burgess, J. "Thermochemical Data." In *NIST Chemistry WebBook, NIST Standard Reference Database Number 69*. <https://doi.org/https://doi.org/10.18434/T4D303>.
- (2) Peterson, A. A.; Abild-Pedersen, F.; Studt, F.; Rossmeisl, J.; Nørskov, J. K. How Copper Catalyzes the Electroreduction of Carbon Dioxide into Hydrocarbon Fuels. *Energy Environ. Sci.* **2010**, 3 (9), 1311–1315. <https://doi.org/10.1039/c0ee00071j>.
- (3) Calle-Vallejo, F.; Koper, M. T. M. Theoretical Considerations on the Electroreduction of CO to C2 Species on Cu(100) Electrodes. *Angew. Chemie - Int. Ed.* **2013**, 52 (28), 7282–7285. <https://doi.org/10.1002/anie.201301470>.
